# Supplementary material for: The Gut Microbiome, Aging, and Longevity: A Systematic Review
Source: MDPI journal article supplement (doi:10.3390/nu12123759), 2020-12-07
Supplement: s1 [file s1]

## Supplementary Material

**Table S1. Sample and clinical characteristics of reviewed studies**

| Publication                | Country                    | Rural/Urban | Sample Sizes | Mean Age                                  | Gender               | Sample Characteristics                                                                                                                                                                                   | Clinical Assessments |
|----------------------------|----------------------------|-------------|--------------|-------------------------------------------|----------------------|----------------------------------------------------------------------------------------------------------------------------------------------------------------------------------------------------------|----------------------|
| <i>Centenarian Studies</i> |                            |             |              |                                           |                      |                                                                                                                                                                                                          |                      |
| Biagi et al.,<br>2016      | Italy                      | Urban       |              | SCTN: 106.2<br>(SD=1.4; range<br>105-109) |                      | SCTN: 7 in nursing homes, 19 severely<br>disabled, 5 affected by cancer in the past, 3<br>with cancer at the time of assessment; on<br>variety of medications; BMI for 13<br>participants: 23.2 (SD=4.2) | None reported        |
|                            |                            |             | SCTN: 24     | LL: 100.4<br>(SD=1.4; range<br>99-104)    | SCTN: 6M:18F         |                                                                                                                                                                                                          |                      |
|                            |                            |             | LL: 15       |                                           | LL: 1M:14F           | SCTN and LL: Physical and cognitive health<br>status matched the majority of Italian<br>centenarians                                                                                                     |                      |
|                            |                            |             | YO: 15       | YO: 72.5<br>(SD=3.7; range<br>65-75)      | YO: 8M:7F            |                                                                                                                                                                                                          |                      |
|                            |                            |             | ADT: 15      |                                           | ADT: 7M:8F           | YO: from the same regions as SCTN; no info<br>on BMI                                                                                                                                                     |                      |
| Drago et al.,<br>2012      | Italy                      | Urban       |              | ADT: 30.5<br>(SD=7.9; range<br>22-48)     |                      | ADT: recruited from the same regions as<br>SCTN; healthy; medication-free; followed<br>Mediterranean diet; no info on BMI                                                                                | None reported        |
|                            |                            |             | CTN: 14      | CTN: not<br>reported<br>(range 100-104)   | CTN: not<br>reported | CTN: recruited from nursing homes; no<br>history of chronic inflammatory bowel<br>diseases or metabolic diseases; no antibiotics<br>or probiotics one month before sampling<br>period; no info on BMI    |                      |
|                            |                            |             | ADT: 10      | ADT: not<br>reported<br>(range 24-57)     | ADT: not<br>reported | ADT: no history of chronic inflammatory<br>bowel diseases or metabolic diseases; no<br>antibiotics or probiotics one month before<br>sampling period; no info on BMI                                     |                      |
| Kim et al.,<br>2019        | Republic of<br>South Korea | Rural       | LL: 30       | LL: 98.9<br>(SD=3.4; range<br>95-108)     | LL: 3M:27F           | LL: 20 community-dwelling; 10 in<br>rehabilitation hospitals; all from longevity<br>villages; no systemic antibiotic use within one<br>month prior to sampling; no info on BMI                           | None reported        |
|                            |                            |             | YO: 17       | YO: 73.6<br>(SD=3.6; range<br>67-79)      | YO: 10M:7F           |                                                                                                                                                                                                          |                      |
|                            |                            |             | ADT: 9       |                                           | ADT: 6M:3F           | YO: community-dwelling; recruited from<br>same regions (urbanized towns or longevity<br>villages); no info on BMI                                                                                        |                      |

|                          |       |       |                                                      |                                                                                                                                            |                                                                     |                                                                                                                                                                                                                                                                                                                                                                                                                                                                                                                                       |               |
|--------------------------|-------|-------|------------------------------------------------------|--------------------------------------------------------------------------------------------------------------------------------------------|---------------------------------------------------------------------|---------------------------------------------------------------------------------------------------------------------------------------------------------------------------------------------------------------------------------------------------------------------------------------------------------------------------------------------------------------------------------------------------------------------------------------------------------------------------------------------------------------------------------------|---------------|
|                          |       |       |                                                      | ADT: 34.3<br>(SD=6.5; range<br>26-43)                                                                                                      |                                                                     | ADT: community-dwelling; recruited from<br>same regions (urbanized towns or longevity<br>villages); no info on BMI                                                                                                                                                                                                                                                                                                                                                                                                                    |               |
| Kong et al.,<br>2016     | China | Urban | LL: 67<br>ADT: 101                                   | LL: 93.3<br>(SD=3.1; range<br>90-102)<br>ADT: 62.0<br>(SD=14.1;<br>range: 24-83)                                                           | LL: 26M:41F<br>ADT: 52M:44F                                         | LL: community-dwelling; no info on BMI<br>ADT: recruited from the same regions as LL;<br>no info on BMI                                                                                                                                                                                                                                                                                                                                                                                                                               | None reported |
| Rampelli et<br>al., 2013 | Italy | Urban | LL: 3<br>YO: 5<br>ADT: 1                             | LL: 100.7<br>(SD=not<br>reported;<br>range 99-102)<br>YO: 66.4<br>(SD=not<br>reported;<br>range 59-75)<br>ADT: 38                          | LL: not<br>reported<br>YO: not<br>reported<br>ADT: not<br>reported  | LL: recruited from region in Northern Italy;<br>no info on BMI<br>YO: recruited from the same regions as LL; 3<br>were offspring of LL; no info on BMI<br>ADT: recruited from same region as LL; no<br>info on BMI<br>All subjects were overlapping with Biagi et<br>al., 2016.                                                                                                                                                                                                                                                       | None reported |
| Tuikhar et al.,<br>2019  | India | Rural | LL: 30<br>ADT internal:<br>30<br>ADT<br>external: 30 | LL: 99.9<br>(SD=3.55;<br>range 97-110)<br>ADT internal:<br>35.8 (SD=6.3;<br>range 28-47)<br>ADT external:<br>34.8 (SD=7.9;<br>range 22-50) | LL: 15M:15F<br>ADT internal:<br>12M:18F<br>ADT external:<br>15M:15F | LL: Chandel and Senapati districts of<br>Manipur state (high centenarian prevalence);<br>no antibiotic treatment within 6 months prior<br>of sampling; no info on BMI<br>ADT internal: recruited from same regions as<br>LL; no antibiotic treatment within 6 months<br>prior of sampling; no info on BMI<br>ADT external: recruited from different<br>regions from LL with low centenarian<br>prevalence (Meitei community of Imphal<br>West district); no antibiotic treatment within 6<br>months prior of sampling; no info on BMI | None reported |
| Wu et al.,<br>2019       | Italy | Rural | LL: 19<br>YO: 23                                     | LL: 101.8<br>(SD=2.0; range<br>99-107)                                                                                                     | LL: 6M:13F<br>YO: 10M:13F                                           | LL: no history of chronic medical conditions;<br>no antimicrobial medication 1 year prior to<br>sampling; BMI: 23.5 (SD=2.8)                                                                                                                                                                                                                                                                                                                                                                                                          | None reported |

|                         |         |       |                                                                  |                                                                                                                                                                       |                                                                                                         |                                                                                                                                                                                                                                                                                                                                                                                                                                                          |                 |
|-------------------------|---------|-------|------------------------------------------------------------------|-----------------------------------------------------------------------------------------------------------------------------------------------------------------------|---------------------------------------------------------------------------------------------------------|----------------------------------------------------------------------------------------------------------------------------------------------------------------------------------------------------------------------------------------------------------------------------------------------------------------------------------------------------------------------------------------------------------------------------------------------------------|-----------------|
|                         |         |       | ADT: 17                                                          | YO: 77.2<br>(SD=6.7; range<br>68-88)                                                                                                                                  | ADT: 7M:10F                                                                                             | YO: no history of chronic medical conditions;<br>no antimicrobial medication 1 year prior to<br>sampling; BMI: 25.9 (SD=5.2)                                                                                                                                                                                                                                                                                                                             |                 |
|                         |         |       |                                                                  | ADT: 25.5<br>(SD=4.0; range<br>21-33)                                                                                                                                 |                                                                                                         | ADT: no history of chronic medical<br>conditions; no antimicrobial medication 1<br>year prior to sampling; BMI: 22.8 (SD=5.5)                                                                                                                                                                                                                                                                                                                            |                 |
| Yu et al., 2015         | China   | Rural | LL: 21<br><br>CK: 28                                             | LL: 73.2<br>(SD=12.7;<br>range 50-95)<br><br>CK: 50 (SD=not<br>reported;<br>range not<br>reported)                                                                    | LL: 10M:11F<br><br>CK: Not<br>reported                                                                  | LL: no antibiotic use 6 months prior to<br>sampling; no hx of gastrointestinal diseases;<br>from Gaotian longevity villages; no info on<br>BMI<br><br>CK: control group; no antibiotic use 6 months<br>prior to sampling; no hx of gastrointestinal<br>diseases; no long-living record in their<br>families; no info on BMI                                                                                                                              | None reported   |
| <i>Lifespan Studies</i> |         |       |                                                                  |                                                                                                                                                                       |                                                                                                         |                                                                                                                                                                                                                                                                                                                                                                                                                                                          |                 |
| Claesson et al.<br>2012 | Ireland | Urban | YO: 178<br><br>ADT: 13                                           | YO: 78 (SD=8;<br>64-102)<br><br>ADT: 36 (SD=6;<br>range 28-46)                                                                                                        | YO: not<br>reported<br><br>ADT: not<br>reported                                                         | YO: 83 community-dwelling; 20 day-hospital;<br>15 short-term rehabilitation hospital care; 60<br>long-term care facilities; no hx of alcohol<br>abuse or advanced organic disease; no<br>antibiotic treatments or participation in<br>investigational drug evaluation within 30<br>days prior to sampling; no info on BMI<br><br>ADT: control group; no info on matching; no<br>antibiotic treatment within 30 days prior to<br>sampling; no info on BMI | Diet (FFQ, MNA) |
| Hippe et al.,<br>2011   | Austria | Urban | YO: 15<br><br>ADT<br>vegetarians: 15<br><br>ADT<br>omnivores: 17 | YO: 86<br>(SD=8; range<br>not reported)<br><br>ADT<br>vegetarians: 26<br>(SD=5; range<br>not reported)<br><br>ADT<br>omnivores: 24<br>(SD=2.5; range<br>not reported) | YO: not<br>reported<br><br>ADT<br>vegetarians:<br>not reported<br><br>ADT<br>omnivores: not<br>reported | YO: institutionalized; BMI: 21.8 (SD=5.1),<br><br>ADT vegetarians: BMI 21.0 (SD=2.7)<br><br>ADT omnivores: BMI 22.7 (SD= 3.4)                                                                                                                                                                                                                                                                                                                            | None reported   |

|                         |                   |       |            |                                                |                        |                                                                                                                                                                                                                                            |               |
|-------------------------|-------------------|-------|------------|------------------------------------------------|------------------------|--------------------------------------------------------------------------------------------------------------------------------------------------------------------------------------------------------------------------------------------|---------------|
| Hopkins et al.<br>2002  | United<br>Kingdom | Urban |            | NHYO: not<br>reported<br>(range 68-73)         |                        | NHYO: diagnosed with CDAD at the time of<br>sampling; no info on BMI                                                                                                                                                                       |               |
|                         |                   |       | NHYO: 4    | YO: not<br>reported<br>(range 67-88)           | NHYOL: not<br>reported | YO: no history of gastrointestinal disease; no<br>antibiotic use within 2 months prior to<br>sampling                                                                                                                                      |               |
|                         |                   |       | YO: 5      |                                                | YO: not<br>reported    |                                                                                                                                                                                                                                            |               |
|                         |                   |       | ADT: 7     | ADT: not<br>reported<br>(range 21-34)          | ADT: not<br>reported   | ADT: no history of gastrointestinal disease;<br>no antibiotic use within 2 months prior to<br>sampling                                                                                                                                     | None reported |
|                         |                   |       | CHD: 10    | CHD: not<br>reported<br>(range 16<br>months-7) | CHD: not<br>reported   | CHD: no history of gastrointestinal disease;<br>no antibiotic use within 2 months prior to<br>sampling                                                                                                                                     |               |
| Jeffery et al.,<br>2016 | Ireland           | Urban | YO: 371    | YO: 78 (SD=8;<br>range 64-102)                 | YO: not<br>reported    | YO: 179 community-dwelling, 44 day-<br>hospital, 41 in short-term rehabilitation<br>care, 107 in long-term care facilities; no hx of:<br>alcohol abuse, participation in drug<br>intervention, advanced organic disease; no<br>info on BMI | None reported |
|                         |                   |       | ADT: 13    | ADT: 36 (SD=6;<br>range 28-46)                 | ADT: not<br>reported   | ADT: no antibiotic treatment within 30 days<br>prior to sampling; no info on BMI                                                                                                                                                           |               |
| Kato et al.,<br>2017    | Japan             | Urban | Age Groups |                                                |                        |                                                                                                                                                                                                                                            |               |
|                         |                   |       | 100: 5     | 100: 101.6<br>(SD=1.8; range:<br>100 and up)   | 100: 0M:5F             |                                                                                                                                                                                                                                            |               |
|                         |                   |       | 90: 19     |                                                | 90: 4M:15F             |                                                                                                                                                                                                                                            |               |
|                         |                   |       | 80: 51     | 90: 94.2<br>(SD=2.7; range<br>90-99)           | 80: 17M:34F            |                                                                                                                                                                                                                                            |               |
|                         |                   |       | 70: 31     |                                                | 70: 12M:19F            |                                                                                                                                                                                                                                            |               |
|                         |                   |       | 60: 42     | 80: 83.2<br>(SD=2.4; range<br>80-89)           | 60: 14M:28F            | All subjects were community-dwelling                                                                                                                                                                                                       | None reported |
|                         |                   |       | 50: 29     |                                                | 50: 13M:16F            |                                                                                                                                                                                                                                            |               |
|                         |                   |       | 40: 37     | 70: 75.5<br>(SD=2.9; range<br>70-79)           | 40: 13M:24F            |                                                                                                                                                                                                                                            |               |
|                         |                   |       | 30: 114    |                                                | 30: 54M:60F            |                                                                                                                                                                                                                                            |               |

|                             |            |                 |        |                                                  |             |                              |               |
|-----------------------------|------------|-----------------|--------|--------------------------------------------------|-------------|------------------------------|---------------|
|                             |            |                 |        | 60: 64.2<br>(SD=2.9; range<br>60-69)             | 20: 16M:26F |                              |               |
|                             |            |                 | 20: 42 |                                                  | 10: 7M:3F   |                              |               |
|                             |            |                 | 10: 10 | 50: 53.5<br>(SD=2.7; range<br>50-59)             | 4: 7M:10F   |                              |               |
|                             |            |                 | 4: 17  |                                                  | 3: 10M:11F  |                              |               |
|                             |            |                 | 3: 21  | 40: 43.7<br>(SD=3.1; range<br>40-49)             | 2: 7M:5F    |                              |               |
|                             |            |                 | 2: 12  |                                                  | 1: 9M:7F    |                              |               |
|                             |            |                 | 1: 16  | 30: 34.3<br>(SD=2.5; range<br>30-39)             |             |                              |               |
|                             |            |                 |        | 20: 25.8<br>(SD=2.7; range<br>20-29)             |             |                              |               |
|                             |            |                 |        | 10: 14.1<br>(SD=3.6; range<br>10-19)             |             |                              |               |
|                             |            |                 |        | 4: 5.9 (SD=1.8;<br>range 4-9)                    |             |                              |               |
|                             |            |                 |        | 3: 2.4 (SD=0.6;<br>range Weaned-<br>3 years old) |             |                              |               |
|                             |            |                 |        | 2: 0.8 (SD=0.4;<br>Weaning)                      |             |                              |               |
|                             |            |                 |        | 1: 0.3 (SD=0.1;<br>preweaning)                   |             |                              |               |
|                             |            |                 | LL: 6  |                                                  | LL: 0M:6F   |                              |               |
|                             |            |                 | YO: 17 | LL: not<br>reported<br>(range 90 and<br>up)      | YO: 0M:17F  | LL: healthy; no info on BMI  |               |
| Kushugulova<br>et al., 2015 | Kazakhstan | Not<br>reported | ADT: 6 |                                                  | ADT: 0M:6F  | YO: healthy; no info on BMI  | None reported |
|                             |            |                 |        |                                                  |             | ADT: healthy; no info on BMI |               |

|                         |         |                 |                                                                                                      |                                                                                                                                                                                                                                                                                                                 |                                                                                                                                                                                                                                                    |                                                                                                                                                         |               |
|-------------------------|---------|-----------------|------------------------------------------------------------------------------------------------------|-----------------------------------------------------------------------------------------------------------------------------------------------------------------------------------------------------------------------------------------------------------------------------------------------------------------|----------------------------------------------------------------------------------------------------------------------------------------------------------------------------------------------------------------------------------------------------|---------------------------------------------------------------------------------------------------------------------------------------------------------|---------------|
|                         |         |                 |                                                                                                      | YO: not reported<br>(range 50-70)                                                                                                                                                                                                                                                                               |                                                                                                                                                                                                                                                    |                                                                                                                                                         |               |
|                         |         |                 |                                                                                                      | ADT: not reported<br>(range 30-44)                                                                                                                                                                                                                                                                              |                                                                                                                                                                                                                                                    |                                                                                                                                                         |               |
| Le Roy et al.,<br>2015  | Estonia | Urban           | YO: 33<br><br>ADT: 16                                                                                | YO: not reported<br>(range 65-81)<br><br>ADT: not reported<br>(range 20-48)                                                                                                                                                                                                                                     | YO: not reported<br><br>ADT: not reported                                                                                                                                                                                                          | YO: generally healthy; followed a standard Western-type diet; no info on BMI<br><br>ADT: healthy; followed a standard Western-type diet; no info on BMI | None reported |
|                         |         |                 | Age Groups<br>100: 6<br><br>90: 19<br><br>80: 48<br><br>70: 15<br><br>60: 28<br><br>50: 25           | 100: 101.3<br>(SD=1.8; range:<br>100 and up)<br><br>90: 94.2<br>(SD=2.7; range<br>90-99)<br><br>80: 83.3<br>(SD=2.4; range<br>80-89)<br><br>70: 76.8<br>(SD=2.1; range<br>70-79)<br><br>60: 63 (SD=2.7;<br>range 60-69)<br><br>50: 53.3<br>(SD=2.6; range<br>50-59)<br><br>40: 43.8<br>(SD=3.1; range<br>40-49) | 100: 0M:6F<br><br>90: 4M:15F<br><br>80: 16M:32F<br><br>70: 5M:10F<br><br>60: 11M:17F<br><br>50: 12M:13F<br><br>40: 13M:21F<br><br>30: 45M:43F<br><br>20: 16M:24F<br><br>10: 7M:3F<br><br>4: 6M:8F<br><br>3: 10M:8F<br><br>2: 6M:6F<br><br>1: 7M:7F |                                                                                                                                                         |               |
| Odamaki et<br>al., 2016 | Japan   | Not<br>reported | 40: 34<br><br>30: 88<br><br>20: 40<br><br>10: 10<br><br>4: 14<br><br>3: 18<br><br>2: 12<br><br>1: 14 |                                                                                                                                                                                                                                                                                                                 |                                                                                                                                                                                                                                                    | All participants were community-dwelling;<br>no info on BMI                                                                                             | None reported |

|                         |       |       |            |                                                  |             |                                                         |               |
|-------------------------|-------|-------|------------|--------------------------------------------------|-------------|---------------------------------------------------------|---------------|
|                         |       |       |            | 30: 33.9<br>(SD=2.3; range<br>30-39)             |             |                                                         |               |
|                         |       |       |            | 20: 25.9<br>(SD=2.7; range<br>20-29)             |             |                                                         |               |
|                         |       |       |            | 10: 14.1<br>(SD=3.6; range<br>10-19)             |             |                                                         |               |
|                         |       |       |            | 4: 6.1 (SD=1.9;<br>range 4-9)                    |             |                                                         |               |
|                         |       |       |            | 3: 2.4 (SD=0.6;<br>range Weaned-<br>3 years old) |             |                                                         |               |
|                         |       |       |            | 2: 0.8 (SD=0.4;<br>Weaning)                      |             |                                                         |               |
|                         |       |       |            | 1: 0.3 (SD=0.1;<br>preweaning)                   |             |                                                         |               |
| Odamaki et<br>al., 2018 | Japan | Urban | Age Groups | 100: 101.3                                       | 100: 0M:6F  | All subjects were community-dwelling; no<br>info on BMI | None reported |
|                         |       |       | 100: 6     | (SD=1.8; range:<br>100 and up)                   | 90: 4M:15F  |                                                         |               |
|                         |       |       | 90: 19     |                                                  |             |                                                         |               |
|                         |       |       |            | 90: 94.2                                         | 80: 17M:34F |                                                         |               |
|                         |       |       | 80: 51     | (SD=2.7; range<br>90-99)                         | 70: 12M:19F |                                                         |               |
|                         |       |       | 70: 31     |                                                  |             |                                                         |               |
|                         |       |       |            | 80: 83.2                                         | 60: 14M:28F |                                                         |               |
|                         |       |       | 60: 42     | (SD=2.4; range<br>80-89)                         | 50: 14M:20F |                                                         |               |
|                         |       |       | 50: 34     |                                                  |             |                                                         |               |
|                         |       |       |            | 70: 75.5                                         | 40: 14M:23F |                                                         |               |
|                         |       |       | 40: 37     | (SD=2.9; range<br>70-79)                         | 30: 56M:61F |                                                         |               |
|                         |       |       | 30: 117    |                                                  |             |                                                         |               |
|                         |       |       |            | 60: 64.2                                         | 20: 14M:28F |                                                         |               |
|                         |       |       | 20: 42     | (SD=2.9; range<br>60-69)                         | 10: 7M:3F   |                                                         |               |

|                     |       |       |                                 |                                                                                                                  |                                         |                                                                                                                                                                                                                                                                                    |                                                               |
|---------------------|-------|-------|---------------------------------|------------------------------------------------------------------------------------------------------------------|-----------------------------------------|------------------------------------------------------------------------------------------------------------------------------------------------------------------------------------------------------------------------------------------------------------------------------------|---------------------------------------------------------------|
|                     |       |       | 10: 10                          | 50: 53.7<br>(SD=2.8; range<br>50-59)                                                                             | 4: 7M:10F<br><br>3: 11M:11F             |                                                                                                                                                                                                                                                                                    |                                                               |
|                     |       |       | 3: 22                           | 40: 43.4<br>(SD=3.1; range<br>40-49)                                                                             | 2: 8M:4F<br><br>1: 7M:6F                |                                                                                                                                                                                                                                                                                    |                                                               |
|                     |       |       | 2: 12                           |                                                                                                                  |                                         |                                                                                                                                                                                                                                                                                    |                                                               |
|                     |       |       | 1: 13                           | 30: 34.3<br>(SD=2.6; range<br>30-39)                                                                             |                                         |                                                                                                                                                                                                                                                                                    |                                                               |
|                     |       |       |                                 | 20: 25.8<br>(SD=2.6; range<br>20-29)                                                                             |                                         |                                                                                                                                                                                                                                                                                    |                                                               |
|                     |       |       |                                 | 10: 14.1<br>(SD=3.6; range<br>10-19)                                                                             |                                         |                                                                                                                                                                                                                                                                                    |                                                               |
|                     |       |       |                                 | 4: 5.9 (SD=1.8;<br>range 4-9)                                                                                    |                                         |                                                                                                                                                                                                                                                                                    |                                                               |
|                     |       |       |                                 | 3: 2.4 (SD=0.6;<br>range Weaned-<br>3 years old)                                                                 |                                         |                                                                                                                                                                                                                                                                                    |                                                               |
|                     |       |       |                                 | 2: 0.8 (SD=0.4;<br>Weaning)                                                                                      |                                         |                                                                                                                                                                                                                                                                                    |                                                               |
|                     |       |       |                                 | 1: 0.3 (SD=0.1;<br>preweaning)                                                                                   |                                         |                                                                                                                                                                                                                                                                                    |                                                               |
| Pan et al.,<br>2016 | China | Rural | LL Bama: 8<br><br>LL Nanning: 8 | LL Bama: 92<br>(SD not<br>reported;<br>range 80-99)<br><br>LL Nanning: 82.8 (SD not<br>reported;<br>range 80-99) | LL Bama: 3M:5F<br><br>LL Nanning: 4M:4F | LL Bama: from Bama (longevity region);<br>healthy; no antibiotic use within 1 month<br>prior to sampling; no info on BMI<br><br>LL Nanning: from Nanning (not considered a<br>longevity region); healthy; no antibiotic use<br>within 1 month prior to sampling; no info on<br>BMI | Dietary information (FFQ<br>23 and China Food<br>Composition) |



|                        |       |              |          |                                     |               |                                                                                                                                                                                                                                                                                                                                                     |                                                                                                                                                 |
|------------------------|-------|--------------|----------|-------------------------------------|---------------|-----------------------------------------------------------------------------------------------------------------------------------------------------------------------------------------------------------------------------------------------------------------------------------------------------------------------------------------------------|-------------------------------------------------------------------------------------------------------------------------------------------------|
| Ruiz-Ruiz et al., 2019 | Spain | Urban        | YO: 10   | YO: 74.5<br>(SD=4.2; range 68-81)   | YO: 3M:7F     | YO: no history of intestinal organic disorders, chronic diseases; no recent antibiotic treatment; no info on BMI                                                                                                                                                                                                                                    | None reported                                                                                                                                   |
|                        |       |              | ADT: 10  | ADT: 35.4<br>(SD=6.6; range 27-44)  | ADT: 5M:5F    | ADT: no history of intestinal organic disorders, chronic diseases; no recent antibiotic treatment; no info on BMI                                                                                                                                                                                                                                   |                                                                                                                                                 |
|                        |       |              | CHD: 10  | CHD: 3.9<br>(SD=1.4; range 2-5)     | CHD: 5M:5F    | CHD: no history of intestinal organic disorders, chronic diseases; no recent antibiotic treatment; no info on BMI                                                                                                                                                                                                                                   |                                                                                                                                                 |
| Singh et al., 2019     | USA   | Rural        | YO: 33   | YO: 75.5<br>(SD=5.7; range 70-82)   | YO: 14M:19F   | YO: no reported diagnosis of major diseases                                                                                                                                                                                                                                                                                                         | None reported                                                                                                                                   |
|                        |       |              | NHYO: 32 | NHYO: 72.7<br>(SD=3.5; range 70-82) | NHYO: 17M:15F | NHYO: medical hx of CA, CVD, PD, CLD, DM, stroke, or ND                                                                                                                                                                                                                                                                                             |                                                                                                                                                 |
| Cognition Studies      |       |              |          |                                     |               |                                                                                                                                                                                                                                                                                                                                                     |                                                                                                                                                 |
| Anderson et al., 2017  | USA   | Not reported | YO: 37   | YO: 64.6<br>(SD=7.5; range 50-85)   | YO: 10M:27F   | YO: community-dwelling; no history of neurological, developmental, or severe psychiatric disorder; no antibiotic or probiotic use within 30 days prior to sampling; no hx of significant gastrointestinal disorder/surgery; no history of alcohol or illicit drug dependence; no history of severe heart, kidney, or liver problems; no info on BMI | Cognitive flexibility (SCWT); Sleep quality (PSQI)                                                                                              |
| Manderino et al., 2017 | USA   | Urban        | YO: 25   | YO: 64.1<br>(SD=6.5; range 50-85)   | YO: 17M:8F    | YO: ≤1 impaired score; no info on BMI                                                                                                                                                                                                                                                                                                               | Cognitive function (NTB); Global cognitive function (MMSE); attention function (FAB, TMT-A, TMT-B, SCWT); memory (HVLT-R, RCFT); language (FAS) |
|                        |       |              | NHYO: 18 | NHYO: 64.1<br>(SD=9.4; range 50-85) | NHYO: 12M:6F  | All had no hx of neurological, developmental, or severe psychiatric disorder; no antibiotic or probiotic use within 30 days prior to sampling; no history of significant gastrointestinal disorder or surgery; no history of alcohol or illicit drug dependence;                                                                                    |                                                                                                                                                 |

|                             |                |             |                  |                                             |                      |                                                                                                                                                                                                                                                                                                                                                                                        |                                                                                                                                                                 |
|-----------------------------|----------------|-------------|------------------|---------------------------------------------|----------------------|----------------------------------------------------------------------------------------------------------------------------------------------------------------------------------------------------------------------------------------------------------------------------------------------------------------------------------------------------------------------------------------|-----------------------------------------------------------------------------------------------------------------------------------------------------------------|
|                             |                |             |                  |                                             |                      | no history of severe heart, kidney, or liver problems                                                                                                                                                                                                                                                                                                                                  |                                                                                                                                                                 |
| Verdi et al., 2018          | United Kingdom | Urban/Rural | YO: 1551         | YO: 63 (SD not reported; range 40-89)       | YO: 515M:1036F       | YO: from TwinsUK British cohort; community-dwelling; no current diagnosis of dementia, BMI: 25.8 (SD=4.7) for 1368 of 1551                                                                                                                                                                                                                                                             | Reaction time (DLRT); verbal fluency (Addenbrookes Cognitive Examination III); frailty (Fried phenotype); cognitive function (CANTAB-PAL); mental health (MMSE) |
| <i>Intervention Studies</i> |                |             |                  |                                             |                      |                                                                                                                                                                                                                                                                                                                                                                                        |                                                                                                                                                                 |
|                             |                |             |                  |                                             |                      | YO pectin: given pectin extracted from sugar beet pulp; BMI: 25.5 (SD=2.6)                                                                                                                                                                                                                                                                                                             |                                                                                                                                                                 |
|                             |                |             | YO pectin: 24    | YO pectin: 69.5 (SD=3.1; range 65-75)       | YO pectin: 15M/9F    | YO placebo: given maltodextrin; BMI: 26.2 (SD=2.8)                                                                                                                                                                                                                                                                                                                                     |                                                                                                                                                                 |
|                             |                |             | YO placebo: 24   | YO placebo: 69.8 (SD=2.4; range 65-75)      | YO placebo: 12M:12F  | ADT pectin: given pectin extracted from sugar beet pulp; BMI: 23.2 (SD=2.7)                                                                                                                                                                                                                                                                                                            |                                                                                                                                                                 |
| An et al., 2019             | Netherlands    | Urban       | ADT pectin: 25   | ADT pectin: 23.4 (SD=4.5; range 18-40)      | ADT pectin: 8M/17F   | ADT placebo: given maltodextrin; BMI: 22.6 (SD=2.7)                                                                                                                                                                                                                                                                                                                                    | None reported                                                                                                                                                   |
|                             |                |             | ADT placebo: 27  | ADT placebo: 22.8 (SD=4.1; range 18-40)     | ADT placebo: 14M/13F | All participants did/were not: have GI diseases, abdominal surgery, use anti-inflammatory drugs, and/or vitamin supplementation within 14 days prior to sampling; use pro-, pre-, or antibiotics in the 90 days prior to the study; pregnant or lactating; smoking; have hx of side effects toward prebiotic supplements; all participants took the supplements twice a day (15g/days) |                                                                                                                                                                 |
| Björklund et al., 2011      | Finland        | Urban       | YO synbiotic: 23 | YO synbiotic: 71.7 (SD=6.2; range above 65) | YO synbiotic: 5M:19F | YO synbiotic: given synbiotic product comprising of a combination of lactitol and <i>L. acidophilus</i> NCFM group; regular use of NSAID ( $\geq 3$ times per week); no antibiotic use within one month prior to sampling; no info on BMI                                                                                                                                              | None reported                                                                                                                                                   |
|                             |                |             | YO placebo: 24   | YO placebo: 70.3 (SD=7.2;                   | YO placebo: 7M:16F   |                                                                                                                                                                                                                                                                                                                                                                                        |                                                                                                                                                                 |

|                        |                            |       |                                      |                                      |                                                         |                                                                                                                                                                                                                                                                                                                                                                                                                                                                                                                                                                                                                                                                    |                                                                |
|------------------------|----------------------------|-------|--------------------------------------|--------------------------------------|---------------------------------------------------------|--------------------------------------------------------------------------------------------------------------------------------------------------------------------------------------------------------------------------------------------------------------------------------------------------------------------------------------------------------------------------------------------------------------------------------------------------------------------------------------------------------------------------------------------------------------------------------------------------------------------------------------------------------------------|----------------------------------------------------------------|
|                        |                            |       |                                      | range above 65)                      |                                                         | YO placebo: given saccharose; regular use of NSAID ( $\geq 3$ times per week); no critical illness; no antibiotic use within one month prior to sampling; no info on BMI                                                                                                                                                                                                                                                                                                                                                                                                                                                                                           |                                                                |
|                        |                            |       |                                      |                                      |                                                         | All took capsules twice a day.                                                                                                                                                                                                                                                                                                                                                                                                                                                                                                                                                                                                                                     |                                                                |
| Spaiser et al., 2015   | USA                        | Urban | YO probiotic: 16                     | YO probiotic: not reported           | YO probiotic: not reported                              | YO probiotic: given capsules containing mixture of <i>Lactobacillus gasseri</i> KS-13, <i>Bifidobacterium bifidum</i> G9-1, <i>Bifidobacterium longum</i> MM2 (1.5 billion viable cells per capsule), potato starch, and silicon dioxide                                                                                                                                                                                                                                                                                                                                                                                                                           |                                                                |
|                        |                            |       | YO placebo: 16                       | YO placebo: not reported             | YO placebo: not reported                                | YO placebo: given capsules containing potato starch and silicon dioxide                                                                                                                                                                                                                                                                                                                                                                                                                                                                                                                                                                                            | None reported                                                  |
|                        |                            |       |                                      | YO total: 69.8 (SD=0.7; range 65-80) | YO total: 10M:22F                                       | YO total: capsules were taken twice a day; no immune-enhancing dietary supplements, unpasteurized fermented foods, or non-study probiotics; no antibiotic use within 2 months prior to sampling; non-smokers; no gastrointestinal disease; no chemotherapy within a year of sampling; BMI: 28.0 (SD=0.9)                                                                                                                                                                                                                                                                                                                                                           |                                                                |
| Valentini et al., 2014 | France, Germany, and Italy | Urban | YO with diet and VSL#3 treatment: 31 | YO total: 70.1 (SD=3.9; range 65-85) | YO total: 29M:33F (not reported for each treatment arm) | YO with diet and VSL#3 treatment: given capsules (taken twice daily for 8 weeks) containing 112 billion lyophilized bacteria that included <i>Bifidobacterium infantis</i> DSM 24737, <i>Bifidobacterium longum</i> DSM 24736, <i>Bifidobacterium breve</i> DSM 24732, <i>Lactobacillus acidophilus</i> DSM 24735, <i>Lactobacillus delbrückii</i> ssp. <i>bulgaricus</i> DSM 24734, <i>Lactobacillus paracasei</i> DSM 24733, <i>Lactobacillus plantarum</i> DSM 24730, and <i>Streptococcus thermophilus</i> DSM 2473, microcrystalline cellulose, stearic acid, magnesium stearate, silicon dioxide and coloring agent; followed RISTOMED diet plan for 8 weeks | Inflammation (hsCRP, ESR, WBC, fibrinogen, IL-6, TNF-a, IL-10) |
|                        |                            |       | YO with diet alone: 31               | Not reported for each treatment arm  |                                                         |                                                                                                                                                                                                                                                                                                                                                                                                                                                                                                                                                                                                                                                                    | No inflammation subgroup defined by hsCRP < 3 mg/l             |
|                        |                            |       |                                      |                                      |                                                         | YO with diet alone: followed RISTOMED diet plan for 8 weeks                                                                                                                                                                                                                                                                                                                                                                                                                                                                                                                                                                                                        | Low-grade inflammation subgroup defined by hsCRP $\geq 3$ mg/l |
|                        |                            |       |                                      |                                      |                                                         | All had no chronic severe diseases; cancers; gastrointestinal diseases requiring treatment;                                                                                                                                                                                                                                                                                                                                                                                                                                                                                                                                                                        |                                                                |

---

DM; no current infection and antibiotic treatment, no anti-inflammatory drugs within 4 months prior to sampling; no intake of conventional yoghurt, probiotics, prebiotics and symbiotics or other supposed functional foods within the 3 weeks prior to sampling; BMI for full sample: 26.8 (SD=3.6)

---

**Abbreviations Used:** ADT: adult; BMI: body mass index; CA: cancer; CANTAB-PAL: Cambridge Neuropsychological Test Automated Battery-Paired-Associated Learning Test; CDAD: C. difficile-associated diarrhea; CHD: children; CK: control group; CLD: chronic liver disease; CRP: C-reactive protein; CTN: centenarian group; CVD: cardiovascular disease; DLRT: Deary-Liewald Reaction Time; DM: diabetes; ESR: erythrocyte sedimentation rate; F: female; FAB: Frontal Assessment Battery; FAS: Verbal Association Fluency; FFQ: Food Frequency Questionnaire; FMT: fecal microbiota transplantation; G60:  $\geq 60$  years; GI: gastrointestinal; hs-CRP: high sensitivity C-reactive protein; HVLRT: Hopkins Verbal Learning Test – Revised; hx: history; L60:  $< 60$  years; LL: long-living, oldest-old adults; M: male; MMSE: Mini-Mental State Examination; MNA: mini nutritional assessment; ND: neurodegenerative disease; NHYO: non-healthy young-old adult; NSAID: nonsteroidal anti-inflammatory drugs; NTB: neuropsychological test battery; PD: pulmonary disease; PSQI: Pittsburgh Sleep Quality Index; RCDI: recurrent Clostridium difficile infection; RCFT: Rey-Osterrieth Complex Figure Task; SCTN: semi-supercentenarians; SCWT: Stroop Color Word Test; TMT-A: Trail Making Test A; TMT-B: Trail Making Test B; WBC: white blood cell count; YO: young-old adult

---

**Table S2. Microbiome methodology of reviewed studies**

| Publication                        | Sequencing / Genetic Analysis                                                                      | Alpha-Diversity Assessments                              | Beta-Diversity Assessments                                                                                                                                                    | Differential Abundance / Taxonomic Differences Methods                                                                                                                                                                                                                     | Functional Analysis Methods      |
|------------------------------------|----------------------------------------------------------------------------------------------------|----------------------------------------------------------|-------------------------------------------------------------------------------------------------------------------------------------------------------------------------------|----------------------------------------------------------------------------------------------------------------------------------------------------------------------------------------------------------------------------------------------------------------------------|----------------------------------|
| <b>Centenarian Studies</b>         |                                                                                                    |                                                          |                                                                                                                                                                               |                                                                                                                                                                                                                                                                            |                                  |
| Biagi et al., 2016                 | 16S rRNA (V3-V4)<br>Illumina MiSeq (2x300 bp paired-end)                                           | N/A                                                      | UniFrac (unweighted)                                                                                                                                                          | PCR amplification<br>Co-occurrence network analysis<br>Superimposed genus/family abundance on the PCoA plot to identify spatial correlations between samples and bacterial groups                                                                                          | N/A                              |
| Drago et al., 2012                 | 16S rDNA<br>pyrosequencing                                                                         | N/A                                                      | N/A                                                                                                                                                                           | Colony bacteria counts (total aerobes, total anaerobes, <i>enterobacteriaceae</i> , <i>Enterococcus</i> , <i>Staphylococcus</i> , <i>Lactobacillus</i> , <i>Bifidobacterium</i> , <i>Clostridium</i> , <i>Bacteroides</i> , and yeast)<br>Pulsed field gel electrophoresis | N/A                              |
| Kim et al., 2019                   | 16S rRNA (V1-V3) pyrosequencing                                                                    | Observed OTUs<br>Shannon index                           | Bray-Curtis                                                                                                                                                                   | Heatmap analyses<br>Random Forests<br>LEfSe                                                                                                                                                                                                                                | PICRUSt (KEGG orthology)         |
| Kong et al., 2016                  | 16S rRNA (V4-V5)<br>Illumina MiSeq (2x250 bp paired protocol)                                      | Chao index,<br>Observed OTUs Shannon index               | Bray-Curtis<br>Jaccard                                                                                                                                                        | Random forests                                                                                                                                                                                                                                                             | N/A                              |
| Rampelli et al., 2013              | Shotgun metagenomic sequencing<br>Illumina (no further details)                                    | Simpson index                                            | Euclidean distance                                                                                                                                                            | MetaPhlAn                                                                                                                                                                                                                                                                  | MetaCV pipeline (KEGG orthology) |
| Tuikhar et al., 2019               | 16S rRNA (V4-V5)<br>Illumina MiSeq<br>qPCR                                                         | Chao1<br>Shannon index                                   | Bray-Curtis                                                                                                                                                                   | qPCR ( <i>Prevotellaceae</i> )<br>Random Forests                                                                                                                                                                                                                           | LC-MS                            |
| Wu et al., 2019                    | Shotgun metagenomic sequencing<br>Illumina HiSeqX10 PE150 platform (average insert size of 350 bp) | Observed OTUs Shannon index                              | Bray-Curtis                                                                                                                                                                   | NMDS<br>MetaPhlan2.0                                                                                                                                                                                                                                                       | Humann2 (KEGG orthology)         |
| Yu et al., 2015                    | 16S rRNA (V4)<br>Illumina MiSeq (250bp/300bp paired-end)<br>qPCR                                   | Chao1<br>Observed OTUs<br>Shannon index                  | UniFrac (unweighted)                                                                                                                                                          | qPCR ( <i>Bacteroides</i> , <i>Bifidobacterium</i> , <i>Enterococcus</i> , <i>Enterobacteriaceae</i> , <i>Clostridium perfringens</i> , <i>Lactobacillus</i> )                                                                                                             | N/A                              |
| <b>Developmental Aging Studies</b> |                                                                                                    |                                                          |                                                                                                                                                                               |                                                                                                                                                                                                                                                                            |                                  |
| Claesson et al. 2012               | 16S rRNA (V4)<br>454 Genome Sequencer FLX<br>Titanium platform                                     | Shannon Index<br>Observed OTUs<br>Phylogenetic diversity | UniFrac (weighted and un-weighted)<br>non-UniFrac (Bray-Curtis, Jaccard, Chisq, Chord, Euclidean, Hamming, Lennon, Ochiai, Pearson, Sorenson, Canberra, Hellinger, Manhattan, | PLS-DA                                                                                                                                                                                                                                                                     | NMR spectroscopy                 |

|                          |                                                                |                                                                                |                                    |                                                                                                                                                                                                                                                                                                                                   |                                                                                                  |
|--------------------------|----------------------------------------------------------------|--------------------------------------------------------------------------------|------------------------------------|-----------------------------------------------------------------------------------------------------------------------------------------------------------------------------------------------------------------------------------------------------------------------------------------------------------------------------------|--------------------------------------------------------------------------------------------------|
|                          |                                                                |                                                                                | Kulczynski, Morisita, Soergel)     |                                                                                                                                                                                                                                                                                                                                   |                                                                                                  |
| Hippe et al., 2011       | 16S rRNA genes and metabolic genes<br>qPCR                     | N/A                                                                            | N/A                                | qPCR ( <i>Clostridium</i> clusters IV and XIVa)<br>Melt curves analyses                                                                                                                                                                                                                                                           | Quantification by qPCR                                                                           |
| Hopkins et al. 2002      | 16S rRNA                                                       | N/A                                                                            | N/A                                | Viable count (total facultative anaerobes, total anaerobes, <i>bifidobacteria</i> , <i>enterococci</i> , <i>C. difficile</i> , <i>enterobacteria</i> , <i>Clostridium perfringens</i> , <i>lactobacilli</i> , <i>Bacteroides</i> , <i>Porphyromonas</i> , <i>Prevotella</i> )                                                     | CFA analysis                                                                                     |
| Jeffery et al., 2016     | 16S rRNA (V4)<br>454 Genome Sequencer FLX<br>Titanium platform | Chao1<br>Shannon Index<br>Simpson<br>Phylogenetic diversity                    | UniFrac                            | N/A                                                                                                                                                                                                                                                                                                                               | N/A                                                                                              |
| Kato et al., 2017        | 16S rDNA<br>qPCR                                               | N/A                                                                            | N/A                                | qPCR ( <i>B. adolescentis</i> group, <i>B. animalis</i> ssp. <i>Lactis</i> , <i>B. bifidum</i> , <i>B. breve</i> , <i>B. catenulatum</i> group, <i>B. dentium</i> , <i>B. gallinarum</i> group, <i>B. longum</i> group, <i>B. longum</i> ssp. <i>longum</i> , <i>B. minimum</i> , <i>B. mongoliense</i> )<br>Melt curves analyses | N/A                                                                                              |
| Kushugulova et al., 2015 | 16S rDNA<br>3730 XL DNA Analyzer                               | N/A                                                                            | N/A                                | Not reported                                                                                                                                                                                                                                                                                                                      | Not reported                                                                                     |
| Le Roy et al., 2015      | 16S 23S rRNA intergenic spacer region<br>qPCR                  | N/A                                                                            | N/A                                | N/A                                                                                                                                                                                                                                                                                                                               | NMR-based metabonomics, O-PLS, model was derived from <sup>1</sup> H-NMR spectra of fecal waters |
| Odamaki et al., 2016     | 16S rRNA (V3-V4)<br>Illumina MiSeq<br>qPCR                     | Chao1<br>Observed OTUs<br>Shannon index<br>Phylogenetic distance<br>whole tree | UniFrac (weighted and un-weighted) | LefSe<br>qPCR ( <i>Bacteroides uniformis</i> , <i>Bifidobacterium longum</i> , <i>Blautia producta</i> , <i>Escherichia coli</i> , <i>Parabacteroides distasonis</i> )                                                                                                                                                            | PICRUSt (KEGG orthology)                                                                         |
| Odamaki et al., 2018     | 16S rRNA (V3-V4)<br>Illumina MiSeq<br>Strain-specific PCR      | N/A                                                                            | N/A                                | Calculated detection rate of gene families<br>Strain-Specific PCR ( <i>B. longum</i> subsp. <i>Longum</i> )                                                                                                                                                                                                                       | Comparative genomics (GF defined by Markov Cluster Algorithm)                                    |
| Pan et al., 2016         | 16S rRNA (V2-V3)<br>Vector NTI software, Clustal X<br>PCR-DGGE | Shannon-Wiener (only for diversity of genus <i>Lactobacillus</i> )             | N/A                                | DGGE fingerprinting                                                                                                                                                                                                                                                                                                               | N/A                                                                                              |
| Ruiz-Ruiz et al., 2019   | N/A                                                            | Margalef microbial richness<br>Pielou's evenness<br>Shannon index              | N/A                                | N/A                                                                                                                                                                                                                                                                                                                               | LC-MS                                                                                            |
| Singh et al., 2019       | 16S rRNA (V1-V3)<br>Illumina MiSeq (2x300 bp)                  | Chao1<br>Shannon Index                                                         | Bray-Curtis                        | DESeq2 1.12.3                                                                                                                                                                                                                                                                                                                     | N/A                                                                                              |
| <b>Cognition Studies</b> |                                                                |                                                                                |                                    |                                                                                                                                                                                                                                                                                                                                   |                                                                                                  |
| Anderson et al., 2017    | 16S rRNA<br>454 FLX Titanium based strategy                    | N/A                                                                            | N/A                                | Not reported                                                                                                                                                                                                                                                                                                                      | N/A                                                                                              |

|                             |                                                                                      |                                                                   |                                   |                                                                                                                                                                                                                                                                                      |                                                             |
|-----------------------------|--------------------------------------------------------------------------------------|-------------------------------------------------------------------|-----------------------------------|--------------------------------------------------------------------------------------------------------------------------------------------------------------------------------------------------------------------------------------------------------------------------------------|-------------------------------------------------------------|
| Manderino et al., 2017      | 16S rRNA<br>454 FLX Titanium based strategy.                                         | N/A                                                               | N/A                               | Not reported                                                                                                                                                                                                                                                                         | N/A                                                         |
| Verdi et al., 2018          | 16S rRNA<br>Illumina MiSeq (2x250 bp paired-end)                                     | Chao1<br>Phylogenetic diversity<br>Observed OTUs<br>Shannon Index | N/A                               | Not reported                                                                                                                                                                                                                                                                         | N/A                                                         |
| <b>Intervention Studies</b> |                                                                                      |                                                                   |                                   |                                                                                                                                                                                                                                                                                      |                                                             |
| An et al., 2015             | 16S rDNA (V5-V6)<br>Illumina HiSeq2500 (2x150 bp)                                    | Faith's phylogenetic diversity<br>Inverse Simpson                 | Unifrac (weighted and unweighted) | Qubit dsDNA BR Assay Kit with Qubit Fluorometer                                                                                                                                                                                                                                      | Gas chromatography coupled with a flame ionization detector |
| Björklund et al., 2011      | qPCR, non-selective DNA-based method, percent guanine-plus cytosine (%G+C) profiling | N/A                                                               | N/A                               | qPCR ( <i>Atopobium</i> , <i>Bacteroides</i> – <i>Prevotella</i> – <i>Porphyromonas</i> group, <i>Lactobacillus</i> , <i>B. coccoides</i> – <i>E. rectale</i> group, <i>Clostridium</i> cluster XIVab, <i>F. prausnitzii</i> and related strains)<br>G+C content regression analysis | N/A                                                         |
| Spaiser et al., 2015        | 16S rRNA<br>pyrosequencing<br>qPCR                                                   | Chao 1<br>Observed OTUs                                           | UniFrac                           | qPCR ( <i>Bifidobacteria</i> , lactic acid bacteria, <i>Escherichia coli</i> )                                                                                                                                                                                                       | N/A                                                         |
| Valentini et al., 2014      | 16S rDNA gene-targeted qPCR ABI model 373A DNA sequencer                             | N/A                                                               | N/A                               | 16S rDNA gene-targeted qPCR ( <i>Clostridium</i> cluster IV, <i>bifidobacteria</i> )                                                                                                                                                                                                 | N/A                                                         |

**Abbreviations Used:** BLAST: Basic Local Alignment Search Tool; CFA: cellular fatty acid; DDGE: denaturing gradient gel electrophoresis; KEGG: Kyoto Encyclopedia of Genes and Genomes; LC-MS: liquid chromatography and mass spectrometry analysis; LEfSe: linear discriminant analysis coupled with effect size measurements; NMDS: nonmetric multidimensional scaling; NMR: nuclear magnetic resonance; O-PLS: orthogonal projection to latent structure; OTU: operational taxonomic unit; PCR: polymerase chain reaction; PCoA: principal coordinates analysis; PLS-DA: partial least squares regression; qPCR: quantitative polymerase chain reaction/real-time polymerase chain reaction; rDNA: ribosomal deoxyribonucleic acid; rRNA: ribosomal ribonucleic acid; V: variable region of 16S rRNA

**Table S3A. Results of studies of the gut microbiome in long-lived individuals**

| Authors            | Alpha-Diversity ( $\alpha$ )                                                                                                                                                                                                                                                                        | Beta diversity ( $\beta$ )                                                                                                                                                                                                                       | Taxonomic Composition                                                                                                                                                                                                                                                                                                                                                                                                                                                                                                                                                                                                                                                                                                                                                                                                                                                                                                                                                                                                                                                                                                                                                                                                                                                                                                                                                                                                                                                                                                                                                                                                                                                                                                                                                                                                                                                                                                                                                                                                                                                                                                                                                                                                                                                                                                                                                                                                                                                                                                                                   | Functional Potential and Metabolites                                                                                                                                                                                                                                                                                                                                                                                                                                                                                                                                                                                                                                                                                                                                                                                |
|--------------------|-----------------------------------------------------------------------------------------------------------------------------------------------------------------------------------------------------------------------------------------------------------------------------------------------------|--------------------------------------------------------------------------------------------------------------------------------------------------------------------------------------------------------------------------------------------------|---------------------------------------------------------------------------------------------------------------------------------------------------------------------------------------------------------------------------------------------------------------------------------------------------------------------------------------------------------------------------------------------------------------------------------------------------------------------------------------------------------------------------------------------------------------------------------------------------------------------------------------------------------------------------------------------------------------------------------------------------------------------------------------------------------------------------------------------------------------------------------------------------------------------------------------------------------------------------------------------------------------------------------------------------------------------------------------------------------------------------------------------------------------------------------------------------------------------------------------------------------------------------------------------------------------------------------------------------------------------------------------------------------------------------------------------------------------------------------------------------------------------------------------------------------------------------------------------------------------------------------------------------------------------------------------------------------------------------------------------------------------------------------------------------------------------------------------------------------------------------------------------------------------------------------------------------------------------------------------------------------------------------------------------------------------------------------------------------------------------------------------------------------------------------------------------------------------------------------------------------------------------------------------------------------------------------------------------------------------------------------------------------------------------------------------------------------------------------------------------------------------------------------------------------------|---------------------------------------------------------------------------------------------------------------------------------------------------------------------------------------------------------------------------------------------------------------------------------------------------------------------------------------------------------------------------------------------------------------------------------------------------------------------------------------------------------------------------------------------------------------------------------------------------------------------------------------------------------------------------------------------------------------------------------------------------------------------------------------------------------------------|
| Biagi et al., 2016 | N/A                                                                                                                                                                                                                                                                                                 | Different between all possible comparisons of age groups (SCTN, LL, YO, ADT), except between SCTN and CTN (unweighted UniFrac)                                                                                                                   | <p><b>Changes with aging (SCTN, LL, YO, ADT):</b><br/> Family: <math>\downarrow</math> <i>Bacteroidaceae</i>, <math>\downarrow</math> <i>Lachnospiraceae</i>, <math>\downarrow</math> <i>Ruminococcaceae</i>, <math>\uparrow</math> <i>Synergistaceae</i>, and <math>\uparrow</math> <i>Christensenellaceae</i> with aging; *cumulative relative abundance, no inferential statistics provided</p> <p>Genera: <math>\downarrow</math> <i>Coproccoccus</i>, <math>\downarrow</math> <i>Roseburia</i>, <math>\downarrow</math> <i>Faecalibacterium</i>, <math>\downarrow</math> <i>Bacteroides</i>, <math>\uparrow</math> <i>Oscillospira</i>, <math>\uparrow</math> <i>Odoribacter</i>, <math>\uparrow</math> <i>Butyricimonas</i>, <math>\uparrow</math> <i>Eggerthella</i>, <math>\uparrow</math> <i>Akkermansia</i>, <math>\uparrow</math> <i>Anaerotruncus</i>, <math>\uparrow</math> <i>Bilophila</i>, <math>\uparrow</math> <i>Bifidobacterium</i> (<math>\downarrow</math> YO and LL, compared to ADT, and <math>\uparrow</math> SCTN); *no inferential statistics provided</p>                                                                                                                                                                                                                                                                                                                                                                                                                                                                                                                                                                                                                                                                                                                                                                                                                                                                                                                                                                                                                                                                                                                                                                                                                                                                                                                                                                                                                                                                   | N/A                                                                                                                                                                                                                                                                                                                                                                                                                                                                                                                                                                                                                                                                                                                                                                                                                 |
| Drago et al., 2012 | N/A                                                                                                                                                                                                                                                                                                 | N/A                                                                                                                                                                                                                                              | <p><b>CTN vs. ADT:</b><br/> Family/Genera: CTN <math>\downarrow</math> <i>Enterobacteriaceae</i>, <math>\downarrow</math> <i>Bifidobacteria</i>, <math>\downarrow</math> <i>Bacteroides</i></p> <p>Species: CTN <math>\uparrow</math> <i>Bifidobacterium longum</i>, <math>\uparrow</math> <i>Clostridia sensu stricto</i></p>                                                                                                                                                                                                                                                                                                                                                                                                                                                                                                                                                                                                                                                                                                                                                                                                                                                                                                                                                                                                                                                                                                                                                                                                                                                                                                                                                                                                                                                                                                                                                                                                                                                                                                                                                                                                                                                                                                                                                                                                                                                                                                                                                                                                                          | N/A                                                                                                                                                                                                                                                                                                                                                                                                                                                                                                                                                                                                                                                                                                                                                                                                                 |
| Kim et al., 2019   | <p><b>LL vs. YO vs. ADT:</b><br/> No difference across groups (Shannon, observed OTUs)</p> <p><b>Longevity villages vs. Urbanized towns:</b><br/> No difference between groups (Shannon, observed OTUs)</p> <p><b>LL: CM vs. RH:</b><br/> No difference between groups (Shannon, observed OTUs)</p> | <p><b>LL vs. YO vs. ADT:</b><br/> Did not report</p> <p><b>Longevity villages vs. Urban towns:</b><br/> Different between groups in PCoA (Bray-Curtis); *no inferential statistics reported</p> <p><b>LL: CM vs. RH:</b><br/> Did not report</p> | <p><b>LL vs. YO vs. ADT:</b><br/> Phylum: LL <math>\uparrow</math> Verrucomicrobia, compared to YO, and <math>\uparrow</math> Verrucomicrobia, <math>\uparrow</math> Proteobacteria, <math>\uparrow</math> Actinobacteria, compared to ADT; YO <math>\downarrow</math> Bacteroidetes and <math>\uparrow</math> Proteobacteria, compared to ADT</p> <p>Family/Genera: LL <math>\downarrow</math> <i>Faecalibacterium</i>, <math>\downarrow</math> <i>Prevotella</i>, <math>\uparrow</math> <i>Escherichia</i>, <math>\uparrow</math> <i>Akkermansia</i>, <math>\uparrow</math> <i>Clostridium</i>, <math>\uparrow</math> <i>Collinsella</i>, <math>\uparrow</math> <i>Streptococcus</i>, <math>\uparrow</math> uncultured <i>Christensenellaceae</i>, compared to YO and ADT</p> <p><b>Longevity villages vs. Urban towns:</b><br/> Phyla: Longevity villages <math>\downarrow</math> Bacteroidetes, <math>\uparrow</math> Firmicutes, compared to urban towns</p> <p>Family/Genera: Longevity villages <math>\downarrow</math> uncultured <i>Lachnospiraceae</i>, <math>\uparrow</math> <i>Intestinibacter</i>, <math>\uparrow</math> <i>Romboutsia</i>, <math>\uparrow</math> <i>Turicibacter</i>, <math>\uparrow</math> <i>Eubacterium_g5</i>, <math>\uparrow</math> <i>Blautia</i>, <math>\downarrow</math> <i>Lachnospira</i>, <math>\downarrow</math> <i>Roseburia</i>, <math>\downarrow</math> <i>Bacteroides</i>, compared to urban towns; YO in longevity villages <math>\uparrow</math> <i>Ruminococcus_g2</i>, compared to ADT in longevity villages and urban towns; longevity villages <math>\uparrow</math> <i>Lactobacillus</i>, compared to YO/ADT in urban towns; LL <math>\downarrow</math> <i>Dialister</i>, compared to ADT in urban towns</p> <p><b>LL: CM vs. RH:</b><br/> Phyla: Community-dwelling <math>\uparrow</math> Firmicutes, <math>\uparrow</math> Tenericutes <math>\downarrow</math> Bacteroidetes, <math>\downarrow</math> Proteobacteria, <math>\downarrow</math> Actinobacteria, <math>\downarrow</math> Verrucomicrobia; *proportions, no inferential statistics provided</p> <p>Genera: Community-dwelling <math>\uparrow</math> <i>Faecalibacterium</i>, <math>\uparrow</math> <i>Intestinibacter</i>, <math>\uparrow</math> <i>Eubacterium_g23</i>, <math>\uparrow</math> <i>Lactobacillus</i>, <math>\uparrow</math> unclassified <i>Lachnospiraceae</i>, <math>\uparrow</math> <i>Dialister</i>, <math>\uparrow</math> <i>Blautia</i>, <math>\uparrow</math> <i>Eubacterium_g5</i>, <math>\uparrow</math></p> | <p><b>LL vs. YO vs. ADT:</b><br/> KEGG Level 1: LL and ADT <math>\uparrow</math> pathways related to metabolism, compared to YO; <math>\downarrow</math> pathways related to genetic information processing in LL, then YO, then ADT; LL and YO <math>\uparrow</math> pathways related to environmental information processing, compared to ADT.</p> <p>KEGG Level 3: 26 metabolic pathways different between groups; of these, LL <math>\uparrow</math> phosphatidylinositol signaling system, compared to YO and ADT; LL and ADT <math>\uparrow</math> glycosphingolipid biosynthesis, compared to YO, and LL <math>\uparrow</math> N-glycan biosynthesis, compared to YO and ADT</p> <p><b>LL: CM vs. RH:</b><br/> KEGG Level 3: carbohydrate metabolism different between groups (direction not specified).</p> |



|                       |                                                                                                                                                                                                                         |                                                                                                            |                                                                                                                                                                                                                                                                                                                                                                                                                                                                                                                                                                                                                                                                                                                                                                                                                                                                                                                                                                                                                                                                                                                                                                                                                                                                                                                                                                                                                                                                                                                                                                    |                                                                                                                                                                                                                                                                                                                                                                                                                                                                                                                                                                                                                                    |
|-----------------------|-------------------------------------------------------------------------------------------------------------------------------------------------------------------------------------------------------------------------|------------------------------------------------------------------------------------------------------------|--------------------------------------------------------------------------------------------------------------------------------------------------------------------------------------------------------------------------------------------------------------------------------------------------------------------------------------------------------------------------------------------------------------------------------------------------------------------------------------------------------------------------------------------------------------------------------------------------------------------------------------------------------------------------------------------------------------------------------------------------------------------------------------------------------------------------------------------------------------------------------------------------------------------------------------------------------------------------------------------------------------------------------------------------------------------------------------------------------------------------------------------------------------------------------------------------------------------------------------------------------------------------------------------------------------------------------------------------------------------------------------------------------------------------------------------------------------------------------------------------------------------------------------------------------------------|------------------------------------------------------------------------------------------------------------------------------------------------------------------------------------------------------------------------------------------------------------------------------------------------------------------------------------------------------------------------------------------------------------------------------------------------------------------------------------------------------------------------------------------------------------------------------------------------------------------------------------|
|                       |                                                                                                                                                                                                                         |                                                                                                            | Agathobacter, ↑ Holdemanella, ↑ Lachnospira, ↑ Roseburia, ↑ Alloprevotella, compared to rehabilitation hospital                                                                                                                                                                                                                                                                                                                                                                                                                                                                                                                                                                                                                                                                                                                                                                                                                                                                                                                                                                                                                                                                                                                                                                                                                                                                                                                                                                                                                                                    |                                                                                                                                                                                                                                                                                                                                                                                                                                                                                                                                                                                                                                    |
| Kong et al., 2016     | LL ↑ observed OTUs, ↑ Chao, ↑ Shannon, compared to ADT; findings validated an independent (Italian) cohort. In RF models, Chao and observed OTUs among top predictors distinguishing LL vs. ADT.                        | Did not assess between LL vs. ADT; different between Italian and Chinese LL cohorts (Bray-Curtis, Jaccard) | <b>LL vs. ADT:</b><br>Family/Genera: LL ↑ <i>Ruminococcaceae</i> , ↑ <i>Christensenellaceae</i> , ↑ <i>Clostridium</i> cluster XIVa, ↑ <i>Akkermansia</i>                                                                                                                                                                                                                                                                                                                                                                                                                                                                                                                                                                                                                                                                                                                                                                                                                                                                                                                                                                                                                                                                                                                                                                                                                                                                                                                                                                                                          | N/A                                                                                                                                                                                                                                                                                                                                                                                                                                                                                                                                                                                                                                |
| Rampelli et al., 2013 | N/A                                                                                                                                                                                                                     | Different between LL and different from YO (Euclidean distance)                                            | <b>LL vs. YO</b><br>Genera: LL ↑ <i>Escherichia</i> , and ↑ <i>Ruminococcus</i> , compared to YO; YO ↑ <i>Faecalibacterium</i> , ↑ <i>Eubacterium</i> , and ↑ <i>Bifidobacterium</i> , compared to LL                                                                                                                                                                                                                                                                                                                                                                                                                                                                                                                                                                                                                                                                                                                                                                                                                                                                                                                                                                                                                                                                                                                                                                                                                                                                                                                                                              | <b>Diversity Findings for KOs:</b><br>α: No differences between LL and YO for KEGG pathways (Simpson index)<br><br>β: LL different from YO and ADT for KEGG pathways (Euclidean distance)<br><br><b>Differential ranking of KEGG pathways related to aging:</b><br>Aging (LL, YO) associated with ↑ metabolism of aromatic amino acids (tryptophan and phenylalanine), metabolism of amino acids (tyrosine, valine and lysine); ADT profile associated with ↑ metabolism of amino acids (histidine) and carbohydrates (glucose, galactose), pyruvate, and butanoate, and ↑ SCFA production.                                        |
| Tuikhar et al., 2019  | LL ↑ Chao1, compared ADT (both in the same village and external groups); no difference in Shannon index<br><br><b><i>Ruminococcaceae</i> family-specific α-diversity:</b> LL ↑ Chao1 and Shannon index, compared to ADT | Different between LL and ADT (Bray-Curtis)                                                                 | <b>LL vs. ADT (combined datasets: Indian, Italian, Japanese and Chinese):</b><br>Family/Genera: LL ↓ <i>Prevotellaceae</i> , ↑ <i>Eggerthella</i> , ↑ <i>Rikenellaceae</i> , ↑ <i>Alistipes</i> , ↑ <i>Porphyromonadaceae</i> , ↑ <i>Parabacteroides</i> , ↑ <i>Porphyromonas</i> , ↑ <i>Odoribacter</i> , ↑ <i>Butyricimonas</i> , ↑ <i>Alicyclobacillaceae</i> , ↑ <i>Alicyclobacillus</i> , ↑ <i>Clostridiaceae</i> , ↑ <i>Finegoldia</i> , ↓ <i>Ruminococcaceae</i> , ↓ <i>Faecalibacterium</i> , ↑ <i>Anaerotruncus</i> , ↑ <i>Enterobacteriaceae</i> , ↑ <i>Desulfovibrionaceae</i> , ↑ <i>Desulfovibrio</i> , ↑ <i>Synergistaceae</i> , ↑ <i>Pyramidobacter</i> , ↑ <i>Verrucomicrobiaceae</i> , ↑ <i>Akkermansia</i> and ↑ <i>Clostridiales</i> Family XI <i>Incertae Sedis</i> , compared to ADT<br><br>Species: LL ↑ <i>Alistipes shahii</i> , ↑ <i>Porphyromonas uenonis</i> , ↑ <i>Odoribacter splanchnicus</i> , ↑ <i>Parabacteroides goldsteinii</i> , ↑ <i>Alicyclobacillus acidoterrestris</i> , ↑ <i>Finegoldia magna</i> , ↑ <i>Clostridium aminobutyricum</i> , ↑ <i>Clostridium p_enrichment_culture_clone_7_25</i> , ↑ <i>Clostridium sp_Kas107_1</i> , ↑ <i>Clostridium hathewayi</i> , ↑ <i>Eubacterium siraeum</i> , ↑ <i>Clostridium cellulolyticum</i> , ↑ <i>Clostridium asparagiforme</i> , ↑ <i>Faecalibacterium prausnitzii</i> , ↑ <i>Clostridium methylpentosum</i> , ↑ <i>Anaerotruncus colihominis</i> , ↑ <i>Escherichia albertii</i> , ↑ <i>Pyramidobacter pisciolens</i> , ↑ <i>Akkermansia muciniphila</i> , compared to ADT | 109 out of 871 metabolites significantly different between LL and ADT.<br><br><b>Diversity Findings for metabolites:</b><br>β: LL different from ADT (Bray-Curtis)<br><br><b>Differential abundance of metabolites in LL vs. ADT (Indian dataset):</b><br>LL ↑ DL-3-Aminoisobutyric acid, ↑ N-Ethylglycine, ↑ gamma-Aminobutyric acid (GABA), ↑ Imidazoleacetic acid, ↑ Niridazole, ↑ Erucic acid, ↑ Dihydroxyphthalic acid, ↑ Nitridazole, ↑ Triacetin, ↑ Goralatide, compared to ADT internal and external; ↓ cyclohexanecarboxylic acid, compared to ADT internal; ↓ 13-cis,16-cis-Docosadienoic acid, compared to ADT external |

|                 |                                                                                                                                                                            |                                                  |                                                                                                                                                                                                                                                                                                                                                                                                                                                                                                                                                                                                                                                                                                                                                                                                                                                                                                                                                          |                                                                                                                                                                                                                                                                                                                                                                                                                                                                                                                                                                                                                                                                                                                                                                                                                                                                                                                                                                                                                                                        |
|-----------------|----------------------------------------------------------------------------------------------------------------------------------------------------------------------------|--------------------------------------------------|----------------------------------------------------------------------------------------------------------------------------------------------------------------------------------------------------------------------------------------------------------------------------------------------------------------------------------------------------------------------------------------------------------------------------------------------------------------------------------------------------------------------------------------------------------------------------------------------------------------------------------------------------------------------------------------------------------------------------------------------------------------------------------------------------------------------------------------------------------------------------------------------------------------------------------------------------------|--------------------------------------------------------------------------------------------------------------------------------------------------------------------------------------------------------------------------------------------------------------------------------------------------------------------------------------------------------------------------------------------------------------------------------------------------------------------------------------------------------------------------------------------------------------------------------------------------------------------------------------------------------------------------------------------------------------------------------------------------------------------------------------------------------------------------------------------------------------------------------------------------------------------------------------------------------------------------------------------------------------------------------------------------------|
|                 |                                                                                                                                                                            |                                                  | <p><b>LL vs. ADT (Indian dataset):</b><br/> Family/Genera: LL ↑ <i>Rikenellaceae</i>, ↑ <i>Alistipes</i>, ↑ <i>Holdemania</i>, ↑ <i>Fusobacteriaceae</i>, ↑ <i>Fusobacterium</i>, ↑ <i>Proteus</i>, ↓ <i>Prevotellaceae</i>, ↓ <i>Prevotella</i>, compared to ADT</p> <p>Species: LL ↑ <i>Bacteroides caccae</i>, ↑ <i>Clostridium hiranonis</i>, ↑ <i>Clostridium</i> sp_MLG480, ↑ <i>Fusobacterium mortiferum</i>, ↑ <i>Clostridium bifermentans</i>, ↑ <i>Clostridium innocuum</i>, ↓ <i>Prevotella copri</i>, compared to ADT</p> <p><b>Indian vs. Other datasets (Italian, Japanese and Chinese):</b><br/> Family: Indian ↑ <i>Erysipelotrichaceae</i>, ↑ <i>Enterobacteriaceae</i>, ↑ <i>Lactobacillaceae</i>, ↑ <i>Leuconostocaceae</i>, ↑ <i>Actinomycetaceae</i>, ↑ <i>Corynebacteriaceae</i>, ↓ <i>Rikenellaceae</i>, ↓ <i>Bacteroidaceae</i>, ↓ <i>Porphyromonadaceae</i>, ↓ <i>Bifidobacteriaceae</i>, compared to other three countries</p> |                                                                                                                                                                                                                                                                                                                                                                                                                                                                                                                                                                                                                                                                                                                                                                                                                                                                                                                                                                                                                                                        |
| Wu et al., 2019 | No difference across age groups (LL, YO, ADT) (Shannon index, observed OTUs); “core microbiota” (present in >50% samples) of LL ↑ species richness, compared to YO and ADT | LL different from YO and ADT (Bray-Curtis)       | <p><b>LL vs. YO vs. ADT:</b><br/> Phyla: LL ↑ Proteobacteria, compared to YO and ADT; LL ↓ Firmicutes and ↓ Firmicutes/Bacteroidetes ratio, compared to YO</p> <p>Genera: LL ↓ <i>Faecalibacterium</i>, ↓ <i>Ruminococcus</i>, ↓ <i>Corprococcus</i>, ↓ <i>Dorea</i>, ↑ <i>Methanobrevibacter</i>, compared to YO and ADT</p> <p>Species: LL ↓ <i>Faecalibacterium prausnitzii</i>, ↓ <i>Eubacterium rectale</i>, ↑ <i>Bifidobacterium adolescentis</i>, ↓ <i>Ruminococcus</i> sp_5_1_39BFAA, ↓ <i>Dorea longicatena</i>, ↑ <i>Methanobrevibacter smithii</i>, compared to YO and ADT</p>                                                                                                                                                                                                                                                                                                                                                                | <p>115 out of 463 gene pathways significantly different among age groups</p> <p><b>Diversity Findings for KOs:</b><br/> α: LL ↑ Shannon and ↑ observed KOs, compared to YO and ADT; no difference between YO and ADT</p> <p>β: LL different from YO and ADT (Bray-Curtis); no difference between YO and ADT</p> <p><b>Differential abundance of KOs in LL vs. YO vs. ADT:</b><br/> LL ↑ pathways related to central metabolism (glycolysis, pentose phosphate pathways, and tricarboxylic acid cycle), ↑ anaerobic respiration, ↑ aerobic respiration, ↑ metabolism of and fermentation to SCFAs (propanoate and acetate), ↓ amino acid biosynthesis pathways (e.g., L-lysine-, L-isoleucine- and L-methionine), ↑ aromatic compounds (e.g., L-phenylalanine metabolism and chorismate biosynthesis), ↓ pathways related to carbohydrate degradation, ↑ vitamin B2 and K2 synthesis pathways, ↑ KOs related to phosphotransferase system, F420, and coenzyme M, compared to YO and ADT; LL and YO ↓ vitamin B1 synthesis pathways, compared to ADT</p> |
| Yu et al., 2015 | LL ↑ Chao1 and Shannon index, compared to CK; *only mean,                                                                                                                  | Different between CK and LL (unweighted UniFrac) | <b>LL vs. CK:</b>                                                                                                                                                                                                                                                                                                                                                                                                                                                                                                                                                                                                                                                                                                                                                                                                                                                                                                                                        | N/A                                                                                                                                                                                                                                                                                                                                                                                                                                                                                                                                                                                                                                                                                                                                                                                                                                                                                                                                                                                                                                                    |

|  |                                                        |  |                                                                                                                                                                                                                                                                                                                                    |  |
|--|--------------------------------------------------------|--|------------------------------------------------------------------------------------------------------------------------------------------------------------------------------------------------------------------------------------------------------------------------------------------------------------------------------------|--|
|  | SD values reported; no inferential statistics provided |  | Phylum: LL ↓ Firmicutes, ↑ Bacteroidetes, ↑ Proteobacteria, ↑ Verrucomicrobia, ↑ Spirochaetes, ↑ Synergistetes, ↑ Thermi<br><br>Genera: ↑ <i>Escherichia</i> , ↑ <i>Phascolarctobacterium</i> , ↑ <i>Parabacteroides</i> , ↑ <i>Desulfovibrio</i> , ↑ <i>Syntrophomonas</i> , ↑ <i>Novosphingobium</i> , ↓ <i>Faecalibacterium</i> |  |
|--|--------------------------------------------------------|--|------------------------------------------------------------------------------------------------------------------------------------------------------------------------------------------------------------------------------------------------------------------------------------------------------------------------------------|--|

**Abbreviations Used:** ADT: adult; CK: control group; CM: community-dwelling older adults; CTN: centenarian group; KEGG: Kyoto Encyclopedia of Genes and Genomes; KO: Kyoto Encyclopedia of Genes and Genomes (KEGG) orthology; LL: long-living, oldest-old adults; OTU: operational taxonomic unit; PCoA: principal component analysis to reduce dimension of variables; RF: random forest; SCTN: semi-supercentenarians; RH: rehabilitation hospital older adults; SD: standard deviation; YO: young-old adult

**Table S3B. Results of studies of the gut microbiome across the lifespan**

| Authors              | Alpha-Diversity ( $\alpha$ )                                                                                                                                                                                                                                                                                                                                                                                                                                                                                                                                                                                                                                                                                                                                                                                                                                                                                                                                                                                                                                                                                                                                                                                               | Beta diversity ( $\beta$ )                                                                      | Taxonomic Composition                                                                                                                                                                                                                                                                                                                                                                                                                                                                                                                                                                                                                                                                                                                                                        | Functional Potential and Metabolites                                                                                                                                                                                                                                                                                                                                                                                                                                                                                                                                                                                                                                                                                                                                                                                                                                                                                                                                                                                                                                   |
|----------------------|----------------------------------------------------------------------------------------------------------------------------------------------------------------------------------------------------------------------------------------------------------------------------------------------------------------------------------------------------------------------------------------------------------------------------------------------------------------------------------------------------------------------------------------------------------------------------------------------------------------------------------------------------------------------------------------------------------------------------------------------------------------------------------------------------------------------------------------------------------------------------------------------------------------------------------------------------------------------------------------------------------------------------------------------------------------------------------------------------------------------------------------------------------------------------------------------------------------------------|-------------------------------------------------------------------------------------------------|------------------------------------------------------------------------------------------------------------------------------------------------------------------------------------------------------------------------------------------------------------------------------------------------------------------------------------------------------------------------------------------------------------------------------------------------------------------------------------------------------------------------------------------------------------------------------------------------------------------------------------------------------------------------------------------------------------------------------------------------------------------------------|------------------------------------------------------------------------------------------------------------------------------------------------------------------------------------------------------------------------------------------------------------------------------------------------------------------------------------------------------------------------------------------------------------------------------------------------------------------------------------------------------------------------------------------------------------------------------------------------------------------------------------------------------------------------------------------------------------------------------------------------------------------------------------------------------------------------------------------------------------------------------------------------------------------------------------------------------------------------------------------------------------------------------------------------------------------------|
| Claesson et al. 2012 | <p><b>YO (CM vs. DH vs. RH vs. LS):</b><br/>CM <math>\uparrow</math> microbial diversity (Number unique OTUs, Shannon index, Phylogenetic diversity) and health food diversity, compared to LS; CM <math>\uparrow</math> microbial diversity (Number unique OTUs, Shannon index, Phylogenetic diversity), compared to DH; CM <math>\uparrow</math> microbial diversity (Number unique OTUs, Phylogenetic diversity) and health food diversity, compared to RH; RH <math>\uparrow</math> microbial diversity (Number unique OTUs) and health food diversity, compared to LS</p> <p><b>Dietary groups: DG1 (low fat/high fiber) vs. DG2 (moderate fat/high fiber) vs. DG3 (moderate fat/low fiber) vs. G4 ('high fat/low fiber):</b><br/>Participants with DG1 <math>\uparrow</math> microbial diversity (Number unique OTUs, Shannon index, Phylogenetic diversity) and health food diversity, compared to DG2, DG3, DG4; DG2 <math>\uparrow</math> microbial diversity (number unique OTUs, Phylogenetic diversity) and health food diversity, compared to DG3, DG4; DG2 <math>\uparrow</math> microbial diversity (Number unique OTUs, Shannon index, Phylogenetic diversity, health food diversity), compared to DG3</p> | Different between CM and LS (unweighted and weighted UniFrac); no difference between CM and ADT | <p><b>CM vs. DH vs. RH vs. LS:</b><br/>Phyla: LS <math>\uparrow</math> Bacteroidetes, compared to CM; CM <math>\uparrow</math> Firmicutes, compared to LS</p> <p>Family/Genera: CM <math>\uparrow</math> <i>Coprococcus</i>, <math>\uparrow</math> <i>Roseburia</i>, <math>\uparrow</math> <i>Lachnospiraceae</i>, compared to LS; LS <math>\uparrow</math> <i>Parabacteroides</i>, <math>\uparrow</math> <i>Eubacterium</i>, <math>\uparrow</math> <i>Anaerotruncus</i>, <math>\uparrow</math> Lactonifactor, <math>\uparrow</math> <i>Coprobacillus</i>, compared to CM</p> <p><b>YO vs. ADT</b><br/>Genus: YO <math>\downarrow</math> <i>Ruminococcus</i>, <math>\downarrow</math> <i>Blautia</i>, <math>\uparrow</math> <i>Escherichia/Shigella</i>, compared to ADT</p> | <p><b>CM vs. RH vs. LS:</b><br/>CM <math>\uparrow</math> total predicted gene counts, compared to RH, LS</p> <p><b>Co-inertia analysis of the microbiota and metabolome:</b><br/>CM and RH <math>\uparrow</math> acetate, <math>\uparrow</math> propionate, <math>\uparrow</math> valerate, compared to LS</p> <p><b>CM vs. LS:</b><br/>NMR identification of chemical shifts of metabolites: CM <math>\uparrow</math> butyrate, <math>\uparrow</math> glutarate, <math>\downarrow</math> glycine, <math>\downarrow</math> glucose, <math>\downarrow</math> lipid, relative to LS</p> <p><b>Gene counts for enzymes:</b><br/>CM <math>\uparrow</math> butyrate, <math>\uparrow</math> acetate, <math>\uparrow</math> propionate, compared to LS; RH <math>\uparrow</math> butyrate, <math>\uparrow</math> acetate, compared to LS</p> <p><b>Average sequencing coverage for enzymes:</b><br/>CM <math>\uparrow</math> butyrate, <math>\uparrow</math> acetate, <math>\uparrow</math> propionate, compared to LS; RH <math>\uparrow</math> butyrate, compared to LS</p> |
| Hippe et al., 2011   | N/A                                                                                                                                                                                                                                                                                                                                                                                                                                                                                                                                                                                                                                                                                                                                                                                                                                                                                                                                                                                                                                                                                                                                                                                                                        | N/A                                                                                             | <p><b>YO vs. ADT omnivores vs. ADT vegetarians:</b><br/>Genus: YO <math>\downarrow</math> <i>Clostridium cluster XIVa</i>, compared to ADT omnivores and ADT vegetarians</p>                                                                                                                                                                                                                                                                                                                                                                                                                                                                                                                                                                                                 | <p><b>YO vs. ADT omnivores vs. ADT vegetarians:</b><br/>YO <math>\downarrow</math> butyryl-CoA:acetate CoA-transferase gene, compared to ADT; <math>\uparrow</math> ADT vegetarians, compared ADT omnivores.</p>                                                                                                                                                                                                                                                                                                                                                                                                                                                                                                                                                                                                                                                                                                                                                                                                                                                       |

|                          |                                                                                                                                                                                                                                                                                                                                                                                               |                                                                                                                                                                                                                                                                                 |                                                                                                                                                                                                                                                                                                                                                                                     |                                                                                                                                                                                                                                                                                                                                                                                                                                                                                             |
|--------------------------|-----------------------------------------------------------------------------------------------------------------------------------------------------------------------------------------------------------------------------------------------------------------------------------------------------------------------------------------------------------------------------------------------|---------------------------------------------------------------------------------------------------------------------------------------------------------------------------------------------------------------------------------------------------------------------------------|-------------------------------------------------------------------------------------------------------------------------------------------------------------------------------------------------------------------------------------------------------------------------------------------------------------------------------------------------------------------------------------|---------------------------------------------------------------------------------------------------------------------------------------------------------------------------------------------------------------------------------------------------------------------------------------------------------------------------------------------------------------------------------------------------------------------------------------------------------------------------------------------|
|                          |                                                                                                                                                                                                                                                                                                                                                                                               |                                                                                                                                                                                                                                                                                 | Species: (Melt curve analysis) YO ↓ <i>Eubacterium hallii</i> / <i>Anaerostipes coli</i> , ↓ <i>E. rectale</i> /Roseburia spp., ↓ <i>F. prausnitzii</i> melt peaks, compared to ADT omnivores and ADT vegetarians                                                                                                                                                                   |                                                                                                                                                                                                                                                                                                                                                                                                                                                                                             |
| Hopkins et al. 2002      | N/A                                                                                                                                                                                                                                                                                                                                                                                           | N/A                                                                                                                                                                                                                                                                             | <b>Healthy (YO vs. ADT vs. CHD) vs. elderly <i>Clostridium difficile</i>-associated diarrhea (NHYO):</b><br>Genus: NHYO ↓ <i>Bacteroides</i> , compared to CHD, ADT and YO; NHYO ↑ <i>Lactobacillus</i> , ↑ <i>clostridia</i> , compared to ADT and YO; YO, NHYO ↓ <i>Bifidobacteria</i> , compared to CHD, ADT.<br><br>Family: ADT ↓ <i>Enterobacteria</i> , compared to CHD, NHYO | NHYO ↑ Saturated straight chain (20:0), ↑ Unsaturated straight chain (20:1 cis 11), ↓ Saturated straight chain (12:0, 15:0) and absence of the branched chain (15:0 ante and 15:0 iso fatty acids); ADT ↑ branched chain CFA, compared to all other groups; ↑ dimethyl acyl (18:1 cis 11 DMA, 14:0 DMA), compared to CHD and NHYO; ↑ 15:0 ante DMA, compared to other groups; CHD did not have dimethyl acyl (18:0 DMA), unsaturated straight chain (16:1 cis 9), compared to other groups. |
| Jeffery et al., 2016     | ↑ stable-microbiota CM, compared to unstable* CM (Shannon diversity); ↑ LS, compared to unstable* LS (Shannon diversity, Chao 1, phylogenetic diversity); ↑ stable-CM, compared to LS (Shannon diversity, Phylogenetic diversity, Simpson diversity)<br><br>*Participants in highest quartile of absolute distance between time point T0 (baseline) and T3 (3 months) are denoted as unstable | <b>LS vs. CM:</b><br>Different between LS and CM (unweighted UniFrac);<br><br><b>DH vs. RH vs. LS vs. CM:</b><br>DH and RH had microbiota clusters in between LS and CM (unweighted UniFrac)<br><br><b>ADT vs. CM:</b><br>No difference between ADT and CM (unweighted UniFrac) | N/A                                                                                                                                                                                                                                                                                                                                                                                 | N/A                                                                                                                                                                                                                                                                                                                                                                                                                                                                                         |
| Kato et al., 2017        | N/A                                                                                                                                                                                                                                                                                                                                                                                           | N/A                                                                                                                                                                                                                                                                             | <b>Pre-weaning to 100 plus years</b><br>Species: <i>B. longum</i> detected in all groups; Elderly ↑ <i>B. dentium</i> , ↓ <i>B. catenulatum</i> ; Adult ↑ <i>B. adolescentis</i> , ↓ <i>B. breve</i> , ↑ <i>B. gallinarum</i> , ↑ <i>B. catenulatum</i> ; Infant ↑ <i>B. breve</i> , ↓ <i>B. adolescentis</i>                                                                       | N/A                                                                                                                                                                                                                                                                                                                                                                                                                                                                                         |
| Kushugulova et al., 2015 | N/A                                                                                                                                                                                                                                                                                                                                                                                           | N/A                                                                                                                                                                                                                                                                             | <b>LL vs. YO vs. ADT</b><br>Phylum: ADT ↑ Bacteroidetes; YO ↑ Firmicutes; LL ↑ Tenericutes, compared to other groups; *no inferential statistics provided<br><br>Species: LL ↓ butyrate-producing and mucin-degrading species, compared with YO, ADT; *no inferential statistics provided                                                                                           | N/A                                                                                                                                                                                                                                                                                                                                                                                                                                                                                         |
| Le Roy et al., 2015      | N/A                                                                                                                                                                                                                                                                                                                                                                                           | N/A                                                                                                                                                                                                                                                                             | <b>YO vs. ADT</b><br>YO ↑ <i>L. paracasei</i> , ↑ <i>L. plantarum</i> , ↓ <i>L. salivarius</i> , and ↓ <i>L. helveticus</i> , compared to ADT                                                                                                                                                                                                                                       | <b>Correlation between <i>Lactobacillus</i> and metabolites:</b><br>↑ <i>Lactobacillus</i> sp. was associated with ↑ SCFAs: acetate, propionate and butyrate, ↑                                                                                                                                                                                                                                                                                                                             |

|                      |                                                                                                                           |                                                                                                                                                                                |                                                                                                                                                                                                                                                         |                                                                                                                                                                                                                                                                                                                                                                                                                                                                                                                                                                                                                                                                                                                                                                                                                                                                                                                                                                                                                                                                                                                                                    |
|----------------------|---------------------------------------------------------------------------------------------------------------------------|--------------------------------------------------------------------------------------------------------------------------------------------------------------------------------|---------------------------------------------------------------------------------------------------------------------------------------------------------------------------------------------------------------------------------------------------------|----------------------------------------------------------------------------------------------------------------------------------------------------------------------------------------------------------------------------------------------------------------------------------------------------------------------------------------------------------------------------------------------------------------------------------------------------------------------------------------------------------------------------------------------------------------------------------------------------------------------------------------------------------------------------------------------------------------------------------------------------------------------------------------------------------------------------------------------------------------------------------------------------------------------------------------------------------------------------------------------------------------------------------------------------------------------------------------------------------------------------------------------------|
|                      |                                                                                                                           |                                                                                                                                                                                |                                                                                                                                                                                                                                                         | <p>lactic acid, ↑ amino acid: (tyrosine, phenylalanine, leucine, isoleucine, valine and lysine); <i>L. helveticus</i> was associated with ↑ butyrate, ↑ lactate, ↑ glucose</p> <p>No difference between ADT and YO in H-NMR metabolic profiles</p>                                                                                                                                                                                                                                                                                                                                                                                                                                                                                                                                                                                                                                                                                                                                                                                                                                                                                                 |
| Odamaki et al., 2016 | ↑ with age (Chao1, number of observed species, Shannon index, phylogenetic distance whole tree)                           | Variation in data due to age (UniFrac distances, both weighted and un-weighted analyses); no differences in gender (UniFrac distances, both weighted and un-weighted analyses) | <p><b>Composition across all ages (0 to 100+):</b><br/>Phyla: With ↑ Age, ↓ Actinobacteria, ↑ Bacteroidetes, ↑ Proteobacteria</p>                                                                                                                       | <p><b>Infant/Elderly vs. Adult enriched clusters:</b><br/>Pre-weaned infants ↓ xylose transporter<br/>Infant/Elderly ↑ drug transporters</p>                                                                                                                                                                                                                                                                                                                                                                                                                                                                                                                                                                                                                                                                                                                                                                                                                                                                                                                                                                                                       |
| Odamaki et al., 2018 | N/A                                                                                                                       | N/A                                                                                                                                                                            | <p><b>Across age groups (pre-weaning to 100+ age)</b><br/>Species: <i>Blautia wexlerae</i>, <i>Streptococcus salivarius</i>, <i>Bifidobacterium longum</i>; *no inferential statistics provided, detected &gt;50% of participants across age groups</p> | <p><b>Negative correlation between ORF and age:</b> ↓<br/>Number of ORF of <i>B. longum</i> subsp. <i>longum</i> strains with ↑ in the age of participants</p> <p><b>Younger vs. Older (GF enriched in <i>B. longum</i> subsp. <i>longum</i> strains)</b><br/>Older (GF:11) ↓ GF involved in carbohydrate transport and metabolism, compared to infants (GF:22); Adults ↑ GF involved defense mechanisms, transcription and replication, recombination and repair, compared other groups.</p> <p>169 GF enriched in <i>B. Longum</i> subsp. <i>longum</i> strains in younger participants vs. 55 GF enriched in older participants; younger participants ↑ sialidase-encoding cluster, ↑ an α arabinofuranosidase gene cluster, ↑ pNAC3 (a 10 kb plasmid) homologue, ↑ capsule biosynthesis related genes and a Type VII secretion system, ↑ some prophage regions found in the AH1206 episome; infants enriched in sialidase clusters; older ↑ extracellular α-L-arabinofuranosidases, putative multidrug-family ABC transporter (associated two-component system), a genetic cluster (Hsp20-family heat shock chaperone), ↑ prophage regions</p> |
| Pan et al., 2016     | No difference between YO Nanning and YO Bama subjects (only for diversity of genus <i>Lactobacillus</i> ; Shannon-Wiener) | N/A                                                                                                                                                                            | <p><b>Representative <i>Lactobacillus</i> species in YO:</b><br/><i>W. confusa</i>, <i>L. mucosae</i>, <i>L. crispatus</i>, <i>L. salivarius</i>, and <i>L. delbrueckii</i></p> <p><b>YO Bama vs. YO Nanning:</b></p>                                   | N/A                                                                                                                                                                                                                                                                                                                                                                                                                                                                                                                                                                                                                                                                                                                                                                                                                                                                                                                                                                                                                                                                                                                                                |

|                        |                                                    |                                                 |                                                                                                                                                                                                                                                                                                                                                                                                                                                                                                                                                                                                                                                                                                                                        |                                                                                                                                                                                                                                                                                                     |
|------------------------|----------------------------------------------------|-------------------------------------------------|----------------------------------------------------------------------------------------------------------------------------------------------------------------------------------------------------------------------------------------------------------------------------------------------------------------------------------------------------------------------------------------------------------------------------------------------------------------------------------------------------------------------------------------------------------------------------------------------------------------------------------------------------------------------------------------------------------------------------------------|-----------------------------------------------------------------------------------------------------------------------------------------------------------------------------------------------------------------------------------------------------------------------------------------------------|
|                        |                                                    |                                                 | <p>Species: Bama ↑ <i>W. confusa</i>, ↑ <i>L. salivarius</i>, ↓ <i>L. mucosae</i>, compared to Nanning</p> <p><b>Correlations with diet:</b><br/> Dietary fibers intake ↑ <i>W. confusa</i>, ↑ <i>L. salivarius</i>, ↓ <i>L. mucosae</i>, ↓ <i>L. crispatus</i>; fat intake ↓ <i>L. salivarius</i>, ↑ <i>L. mucosae</i>; protein intake ↑ <i>L. mucosae</i>; carbohydrate ↓ <i>L. mucosae</i></p>                                                                                                                                                                                                                                                                                                                                      |                                                                                                                                                                                                                                                                                                     |
| Ruiz-Ruiz et al., 2019 | N/A                                                | N/A                                             | N/A                                                                                                                                                                                                                                                                                                                                                                                                                                                                                                                                                                                                                                                                                                                                    | <p><b>Diversity Findings for metabolites:</b><br/> α: YO ↑ compared to CHD, ADT (microbial richness, Pielou's evenness, Shannon index)</p> <p><b>YO vs. ADT vs. CHD:</b><br/> YO ↓ tryptophan and indole production with ↑ age; YO ↓ TnaA, ↓ TrpB, ↓ tryptophan, ↓ indole, compared to CHD, ADT</p> |
| Singh et al., 2019     | No difference between YO and NHYO (Shannon, Chao1) | No difference between YO and NHYO (Bray-Curtis) | <p><b>YO vs. NHYO:</b><br/> Family/Genus: YO ↑ <i>Akkermansia</i>, ↑ <i>Erysipelotrichaceae</i> UCG-003, ↑ <i>Bacteroides</i>, ↓ <i>Streptococcus</i>, ↓ <i>Lactobacillus</i>, ↑ <i>Lachnospiraceae</i> (UCG-005)<sup>1</sup>, ↓ <i>Escherichia</i><sup>1</sup>/<i>Shigella</i><sup>1</sup>, ↑ <i>Cardiobacterium</i>, ↑ <i>Neisseria</i>, ↑ <i>Comamonas</i>, ↑ <i>Capnocytophaga</i>, ↓ <i>Bifidobacterium</i>, ↑ <i>Filifactor</i>, ↑ <i>Fusobacterium</i>, ↑ <i>Propionibacterium</i>, ↑ <i>Haemophilus</i>, ↑ <i>Corynebacterium</i>, ↓ <i>Rothia</i>, ↑ <i>Porphyromonas</i>, ↑ <i>Ruminococcaceae</i> UCG-014, ↑ <i>Prevotella</i> 2, ↑ <i>Peptoclostridium</i>, compared to NHYO;<br/> *no inferential statistics provided</p> | N/A                                                                                                                                                                                                                                                                                                 |

**Abbreviations Used:** ADT: adult; CFA: cellular fatty acid; CHD: children; CM: community-dwelling older adults; DH: day-hospital older adults; DG: dietary group; DMA: dimethyl acid; GF: gene family; LL: long-living, oldest-old adults; LS: long-stay older adults; NHYO: non-healthy younger-old adult; NMR: nuclear magnetic resonance; ORF: open reading frame; OTU: operational taxonomic unit; RH: rehabilitation hospital older adults; SCFA: short chain fatty acid; TnaA: tryptophanase; TrpB: tryptophan synthase; YO: young-old adult

**Table S3C. Results of studies investigating the relationship of the gut microbiome to cognition in older adults**

| Authors                | Alpha-Diversity ( $\alpha$ )                                                                                                                                                                                                                    | Beta diversity ( $\beta$ ) | Taxonomic Composition                                                                                                                                                                                                                                                                                                                                                                                                                                                                                                                                                                                                                                                                                                                                                                 | Functional Potential and Metabolites |
|------------------------|-------------------------------------------------------------------------------------------------------------------------------------------------------------------------------------------------------------------------------------------------|----------------------------|---------------------------------------------------------------------------------------------------------------------------------------------------------------------------------------------------------------------------------------------------------------------------------------------------------------------------------------------------------------------------------------------------------------------------------------------------------------------------------------------------------------------------------------------------------------------------------------------------------------------------------------------------------------------------------------------------------------------------------------------------------------------------------------|--------------------------------------|
| Anderson et al., 2017  | N/A                                                                                                                                                                                                                                             | N/A                        | <b>Associations with cognition and sleep:</b><br>Verrucomicrobia and Lentisphaerae: $\uparrow$ sleep quality.<br><br>Verrucomicrobia: $\uparrow$ word reading, processing speed<br><br>Lentisphaerae: $\uparrow$ cognitive flexibility; non-significant after accounting for sleep                                                                                                                                                                                                                                                                                                                                                                                                                                                                                                    | N/A                                  |
| Manderino et al., 2017 | N/A                                                                                                                                                                                                                                             | N/A                        | <b>NHYO vs. YO:</b><br>YO $\downarrow$ Bacteroidetes, $\downarrow$ Proteobacteria, $\uparrow$ Firmicutes, $\uparrow$ Verrucomicrobia, compared to NHYO<br><br><b>Associations with cognition:</b><br>Phylum: $\uparrow$ Verrucomicrobia showed $\uparrow$ verbal learning, $\uparrow$ visual scanning, $\uparrow$ cognitive set-shifting, $\uparrow$ cognitive flexibility (word reading), $\uparrow$ cognitive flexibility (color naming); $\uparrow$ Firmicutes showed $\uparrow$ spatial perception and visual memory $\uparrow$ memory; $\uparrow$ Bacteroidetes correlated to $\downarrow$ spatial perception and visual memory, $\downarrow$ memory; $\uparrow$ Proteobacteria correlated to $\downarrow$ verbal Recognition/Discrimination, $\downarrow$ FAB, $\downarrow$ FAS | N/A                                  |
| Verdi et al., 2018     | <b>Associations with cognition:</b><br>$\uparrow$ Chao1, phylogenetic diversity, and observed OTU associated with $\downarrow$ reaction time and $\downarrow$ verbal fluency; the latter was no longer significant after accounting for frailty | N/A                        | <b>Associations with cognition:</b><br>Order: $\uparrow$ Burkholderiales associated with $\downarrow$ reaction time<br>Class: $\uparrow$ Betaproteobacteria associated with $\downarrow$ reaction time                                                                                                                                                                                                                                                                                                                                                                                                                                                                                                                                                                                | N/A                                  |

**Abbreviations Used:** FAB: Frontal Assessment Battery; FAS: Verbal Association Fluency; NHYO: non-healthy younger-old adult; OTU: operational taxonomic unit; YO: young-old adult



**Table S3D: Results of studies investigating interventions targeting the microbiome in older adults**

| Authors                | Alpha-Diversity ( $\alpha$ )                                                                                                                                                                                                                                      | Beta diversity ( $\beta$ )                                                                                                                                                                                                                                                                                                                                                                                                                                                                                                                              | Taxonomic Composition                                                                                                                                                                                                                                                                                                                                                                                                                                                                                                                                                                                                                                                                                                          | Functional Potential and Metabolites                                                                                                                                                                                                                                                            |
|------------------------|-------------------------------------------------------------------------------------------------------------------------------------------------------------------------------------------------------------------------------------------------------------------|---------------------------------------------------------------------------------------------------------------------------------------------------------------------------------------------------------------------------------------------------------------------------------------------------------------------------------------------------------------------------------------------------------------------------------------------------------------------------------------------------------------------------------------------------------|--------------------------------------------------------------------------------------------------------------------------------------------------------------------------------------------------------------------------------------------------------------------------------------------------------------------------------------------------------------------------------------------------------------------------------------------------------------------------------------------------------------------------------------------------------------------------------------------------------------------------------------------------------------------------------------------------------------------------------|-------------------------------------------------------------------------------------------------------------------------------------------------------------------------------------------------------------------------------------------------------------------------------------------------|
| An et al., 2019        | <p><b>YO vs. ADT (Baseline):</b><br/>No difference between ADT and YO at baseline (inverse Simpson's index and phylogenetic diversity)</p> <p><b>Pre- vs. Post-Pectin Supplementation:</b><br/>No difference (Faith's PD, inverse Simpson) in both ADT and YO</p> | <p><b>YO vs. ADT (Baseline):</b><br/>Difference between ADT and YO (unweighted UniFrac); no significance difference between ADT and YO (weighted UniFrac)</p> <p><b>Placebo vs. Pectin Supplementation (Baseline):</b><br/>No significant difference (weighted and unweighted UniFrac)</p> <p><b>Pre- vs. Post-Pectin Supplementation:</b><br/>No significant difference (weighted and unweighted UniFrac). Smaller intra-individual (within person) change, compared to Inter-individual (across people) (weighted UniFrac and unweighted UniFrac)</p> | <p><b>YO vs. ADT (Baseline):</b><br/>YO <math>\uparrow</math> <i>Enterorhabdus</i>, <math>\uparrow</math> <i>Ruminiclostridium</i> 6, <math>\uparrow</math> uncultured genus within the family Coriobacteriaceae, <math>\uparrow</math> <i>Mogibacterium</i>, <math>\uparrow</math> <i>Lachnospiraceae</i> (UCG-008), compared to ADT</p> <p><b>YO vs. ADT (Post Pectin Supplementation):</b><br/>YO <math>\uparrow</math> <i>Enterorhabdus</i>, <math>\uparrow</math> uncultured genus within the family Coriobacteriaceae, <math>\uparrow</math> <i>Mogibacterium</i>, <math>\uparrow</math> <i>Lachnospiraceae</i> UCG-008)</p> <p><b>Pre- vs. Post-Pectin Supplementation:</b><br/>No change in taxonomic composition.</p> | <p><b>YO vs. ADT (Baseline):</b><br/>No significant differences in BCFA or SCFA</p> <p><b>Pre- vs. Post-Pectin Supplementation:</b><br/>No significant differences in BCFA or SCFA (acetic acid, propionic acid, butyric acid, valeric acid, isobutyric acid, isovaleric acid) in YO or ADT</p> |
| Björklund et al., 2011 | N/A                                                                                                                                                                                                                                                               | N/A                                                                                                                                                                                                                                                                                                                                                                                                                                                                                                                                                     | <p><b>Placebo vs. Synbiotic:</b><br/>Genera: Synbiotic <math>\uparrow</math> <i>Bifidobacterium</i>, <math>\uparrow</math> <i>L. acidophilus</i> NCFM, compared to placebo; both (synbiotic and placebo) <math>\downarrow</math> <i>Clostridium</i> cluster XIVab, <math>\downarrow</math> <i>Blautia coccoides</i>– <i>Eubacterium rectale</i></p>                                                                                                                                                                                                                                                                                                                                                                            | N/A                                                                                                                                                                                                                                                                                             |
| Spaiser et al., 2015   | <p><b>Placebo vs. Probiotic:</b><br/>No difference between placebo and probiotic groups (Chao1, observed OTUs)</p>                                                                                                                                                | <p><b>Placebo vs. Probiotic:</b><br/>No difference between placebo and probiotic groups (UniFrac)</p>                                                                                                                                                                                                                                                                                                                                                                                                                                                   | <p><b>Placebo vs. Probiotic:</b><br/>Genus: Probiotic <math>\uparrow</math> <i>Bifidobacteria</i> and <math>\uparrow</math> lactic acid bacteria, compared to placebo<br/>Species: Probiotic <math>\downarrow</math> <i>Escherichia coli</i> and <math>\uparrow</math> <i>Faecalibacterium prausnitzii</i>, compared to placebo</p>                                                                                                                                                                                                                                                                                                                                                                                            | N/A                                                                                                                                                                                                                                                                                             |
| Valentini et al., 2014 | N/A                                                                                                                                                                                                                                                               | N/A                                                                                                                                                                                                                                                                                                                                                                                                                                                                                                                                                     | <p><b>Diet only vs. Diet+VSL#3 treatment (Low-grade Inflammation Group):</b><br/>Diet+VSL#3 <math>\uparrow</math> <i>Bifidobacterium</i></p> <p><b>Pre- and Post-Diet+VSL#3 treatment:</b><br/>No change in <i>Clostridium</i> cluster IV, <i>Bifidobacterium</i></p>                                                                                                                                                                                                                                                                                                                                                                                                                                                          | N/A                                                                                                                                                                                                                                                                                             |

|  |  |  |      |  |
|--|--|--|------|--|
|  |  |  | spp. |  |
|--|--|--|------|--|

**Abbreviations Used:** ADT: adult; BCFA: branched chain fatty acids; FMT: fecal microbiota transplantation; OTU: operational taxonomic unit; PD: phylogenetic diversity; SCFA: short chain fatty acids; YO: young-old adult
